# Supplementary material for: Photoinduced, additive- and photosensitizer-free multi-component synthesis of naphthoselenazol-2-amines with air in water
Source: Royal Society of Chemistry journal article supplement (doi:10.1039/d3gc02575f), 2023-01-01

**Photoinduced, Additive- and Photosensitizer-free  
Multi-component Synthesis of  
Naphthoselenazol-2-amines With Air in Water**

Hong-Tao Ji, Ke-Li Wang, Wen-Tao Ouyang, Qing-Xia Luo, Hong-Xia Li,  
Wei-Min He\*

School of Chemistry and Chemical Engineering, University of South China,  
Hengyang 421001, China

E-mail: weiminhe@usc.edu.cn

**Table of Content**

|                                                                                                 |            |
|-------------------------------------------------------------------------------------------------|------------|
| <b>1. General Information.....</b>                                                              | <b>S2</b>  |
| <b>2. Experimental Section.....</b>                                                             | <b>S4</b>  |
| <b>3. Characterization Data of Products.....</b>                                                | <b>S10</b> |
| <b>4. References.....</b>                                                                       | <b>S23</b> |
| <b>5. <sup>1</sup>H NMR, <sup>13</sup>C NMR and <sup>19</sup>F NMR Spectra of Products.....</b> | <b>S24</b> |

## 1. General Information

Unless otherwise noted, all reagents and solvents were obtained from commercial suppliers and used without further purification. GC yield was detected by Agilent GC-MS 8890/5977B. Thin layer chromatography (TLC) employed glass 0.25 mm silica gel plates. Flash chromatography columns were packed with 200-300 mesh silica gel.  $^1\text{H}$  NMR spectra were recorded at 500 MHz and  $^{13}\text{C}$  NMR spectra were recorded at 125 MHz by using a Bruker Avance 500 spectrometer.  $^{19}\text{F}$  NMR data were collected at 471 MHz with complete proton decoupling. Chemical shifts were calibrated using residual undeuterated solvent as an internal reference ( $^1\text{H}$  NMR:  $\text{CDCl}_3$  7.26 ppm,  $^{13}\text{C}$  NMR:  $\text{CDCl}_3$  77.16 ppm), the chemical shifts ( $\delta$ ) were expressed in ppm and J values were given in Hz. The following abbreviations were used to describe peak splitting patterns when appropriate: s = singlet, d = doublet, t = triplet, q = quartet, m = multiplet, dd = doublet of doublets, br = broad. Mass spectra were performed on a spectrometer operating on ESI-TOF. UV/Vis spectra were recorded using a Shimadzu UV-2600 spectrophotometer. The crude products were purified by HPLC (LaboACE LC-5060, Japan Analytical Industry Co., Ltd., Japan) equipped with Jaigel 2.5 HR columns with dichloromethane as the eluent. Cyclic voltammetry was performed on a CHI 660E potentiostat, and the conditions are as follow: a glassy carbon disk working electrode (diameter, 3 mm), Pt disk and Ag/AgCl (0.3 M in MeCN) as counter and reference electrode. The fluorescence emission intensities were recorded on a Hitachi F-7100 fluorescence spectrophotometer.

### Photographic depiction of the reaction setup:

Manufacturer: Beijing Rogertech Ltd.

Model: RLR-22CU

Value: 5836.430  $\mu\text{W}/\text{cm}^2/\text{nm}$

Energy peak wavelength: 453 nm

Peak width at half-height: 22.1 nm

Material of the irradiation vessel: Schlenk flask

Not use any filters

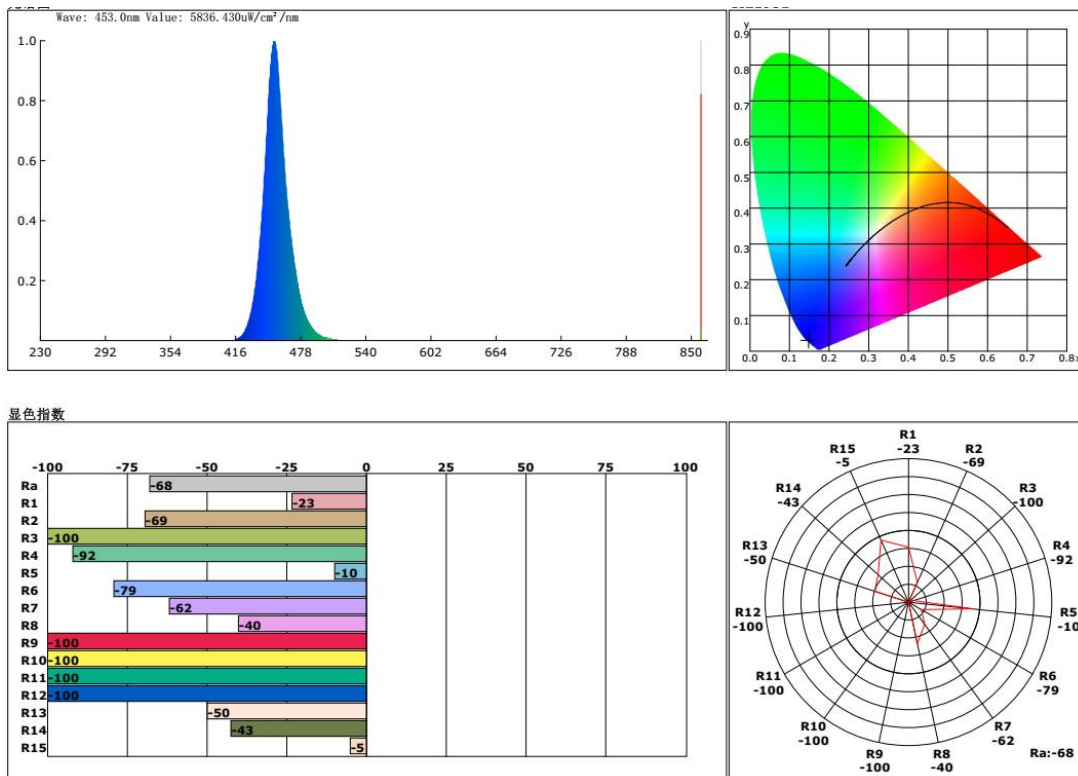

Figure S1 LED spectrum test report

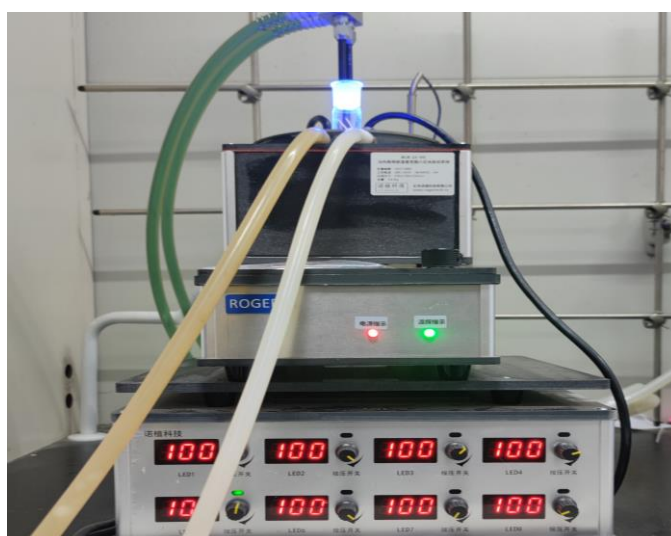

Figure S2 Photographic depiction of the reaction setup

## 2. Experimental Section

### 2.1 General Experimental Procedures for Compounds 4

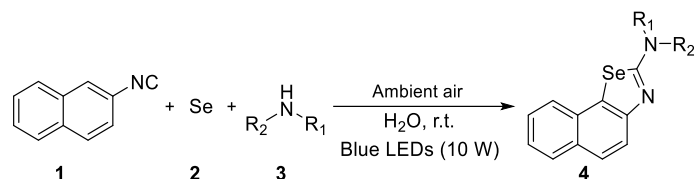

To a 10 mL Schlenk flask equipped with a stirring bar were added 2-isocyanonaphthalene **1** (0.20 mmol), selenium powder **2** (0.24 mmol), amine **3** (0.24 mmol) and  $H_2O$  (2.0 mL). The reaction mixture was stirred and irradiated by 10 W blue LEDs (455 nm) under room temperature for 12 hrs. After completion, the reaction mixture was extracted with 5 mL ethyl acetate, organic phase was dried and concentrated under reduced pressure. The pure products **4** were purified and obtained by flash chromatography on silica gel (elute: petroleum ether/ethyl acetate, 10:1 to 5:1).

### 2.2 Large Scale Synthesis of 4aa

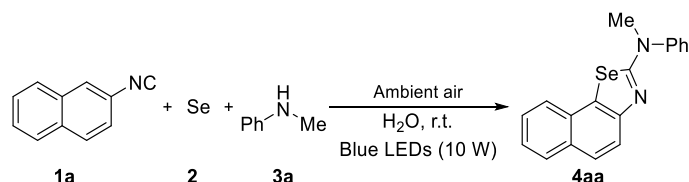

To an Schlenk flask (50 mL) equipped with a stirring bar were added 2-isocyanonaphthalene **1a** (5.0 mmol), selenium powder **2** (6.0 mmol), *N*-methylaniline **3a** (6.0 mmol), and  $H_2O$  (30.0 mL). The reaction mixture was stirred and irradiated by 10 W blue LEDs (455 nm) under room temperature. After completion, the reaction mixture was extracted with ethyl acetate, organic phase was dried and concentrated under reduced pressure. The pure products **4aa** were purified by HPLC in a yield of 81% (1.37 g).

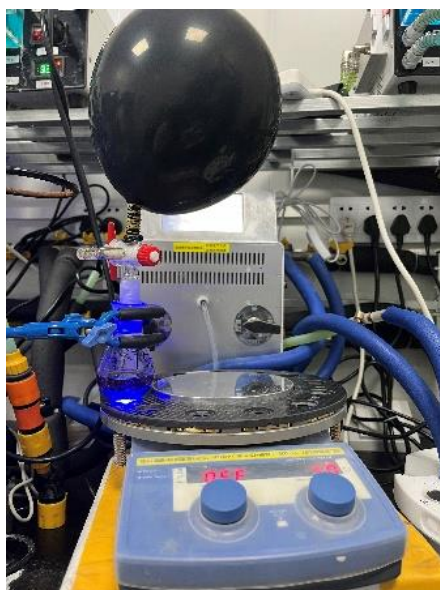

**Figure S3** Photographic depiction of Gram-scale synthesis

### 2.3 Radical Trapped Experiments

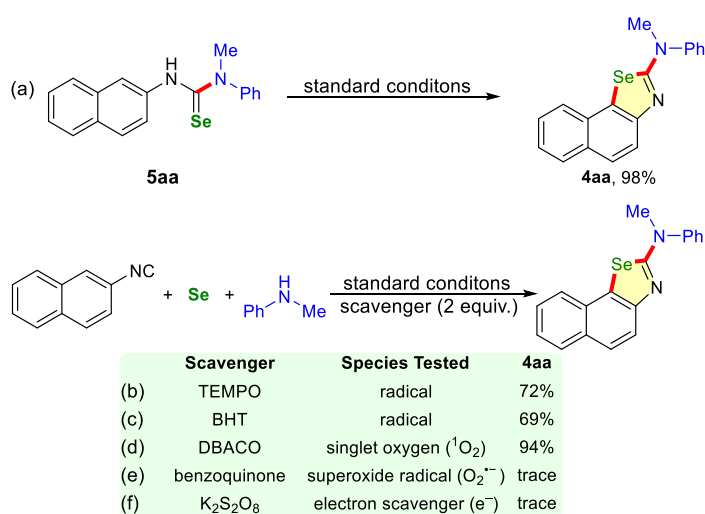

(a) Under the standard conditions, the intermediate **5aa** was added to 2 mL  $\text{H}_2\text{O}$ , the reaction was monitored by TLC. Upon completion, the reaction mixture was analyzed by GC and a 98% GC yield of **4aa** was detected.

(b) To a 10.0 mL Schlenk flask equipped with a magnetic stirring bar were added 2-isocyanonaphthalene **1a** (0.2 mmol), selenium powder **2** (0.24 mmol), and *N*-methylaniline **3a** (0.24 mmol), radical scavengers (TEMPO, 0.4 mmol) and  $\text{H}_2\text{O}$  (2.0 mL). Then the reaction mixture was stirred and irradiated by 10 W blue LEDs at ambient temperature for 12 hrs. The reaction mixture was analyzed by GC and a 72% GC yield of **4aa** was detected.

- (c) To a 10.0 mL Schlenk flask equipped with a magnetic stirring bar were added 2-isocyanonaphthalene **1a** (0.2 mmol), selenium powder **2** (0.24 mmol), and *N*-methylaniline **3a** (0.24 mmol), radical scavengers (BHT, 0.4 mmol) and H<sub>2</sub>O (2.0 mL). Then the reaction mixture was stirred and irradiated by 10 W blue LEDs at ambient temperature for 12 hrs. The reaction mixture was analyzed by GC and a 69% GC yield of **4aa** was detected.
- (d) To a 10.0 mL Schlenk flask equipped with a magnetic stirring bar were added 2-isocyanonaphthalene **1a** (0.2 mmol), selenium powder **2** (0.24 mmol), and *N*-methylaniline **3a** (0.24 mmol), scavengers (DBACO, 0.4 mmol) and H<sub>2</sub>O (2.0 mL). Then the reaction mixture was stirred and irradiated by 10 W blue LEDs at ambient temperature for 12 hrs. The reaction mixture was analyzed by GC and a 94% GC yield of **4aa** was detected.
- (e) To a 10.0 mL Schlenk flask equipped with a magnetic stirring bar were added 2-isocyanonaphthalene **1a** (0.2 mmol), selenium powder **2** (0.24 mmol), and *N*-methylaniline **3a** (0.24 mmol), scavengers (benzoquinone, 1 mmol) and H<sub>2</sub>O (2.0 mL). Then the reaction mixture was stirred and irradiated by 10 W blue LEDs at ambient temperature for 12 hrs. The reaction mixture was analyzed by GC and a trace amount of **4aa** was detected.
- (f) To a 10.0 mL Schlenk flask equipped with a magnetic stirring bar were added 2-isocyanonaphthalene **1a** (0.2 mmol), selenium powder **2** (0.24 mmol), and *N*-methylaniline **3a** (0.24 mmol), scavengers (K<sub>2</sub>S<sub>2</sub>O<sub>8</sub>, 0.4 mmol) and H<sub>2</sub>O (2.0 mL). Then the reaction mixture was stirred and irradiated by 10 W blue LEDs at ambient temperature for 12 hrs. The reaction mixture was analyzed by GC and a trace amount of **4aa** was detected.

#### 2.4 Effect of Visible Light Irradiation

The reaction between **1a** (0.2 mmol), **2** (0.24 mmol) and **3a** (0.24 mmol) was conducted under the standard conditions on a 0.2 mmol scale. The mixture was subjected to sequential periods of stirring under visible light irradiation (10 W blue LEDs) under an air atmosphere at room temperature with 3 hrs and followed by stirring in the absence of light with 3 hrs. At each time point, one reaction system was suspended and the yield was detected by GC.

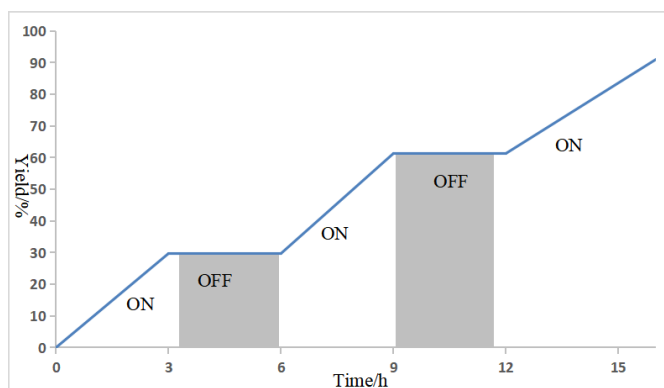

**Figure S4** Visible light irradiation on/off experiments

## 2.5 UV/Vis Absorption Experiment

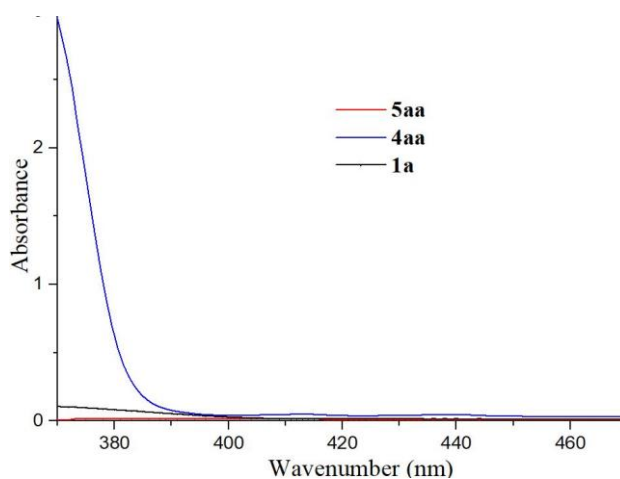

**Figure S5** UV/Vis spectroscopic measurements

The UV/Vis absorption spectra of **1a**, **4aa** and selenourea **5aa** were recorded in 1 cm path quartz cuvettes in a concentration of 0.003 M by using a Shimadzu UV-2600 spectrophotometer, respectively.

## 2.6 Fluorescence Quenching Experiments

The fluorescence emission intensities were measured using a Hitachi F-7100 fluorescence spectrophotometer at an excitation wavelength of 385 nm. The samples consisted of **4aa** (1 mM), the in-situ-formed complex (a mixture of **4aa** and **5aa**) dissolved in THF. The resulting emission intensity data were collected.

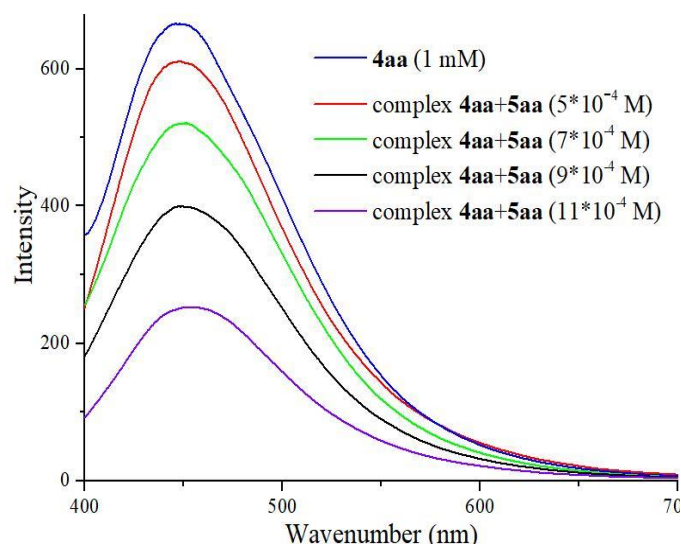

**Figure S6** Fluorescence quenching experiments

## 2.7 Cyclic voltammetry studies

CV measurements were performed on a CHI 660E potentiostat, and the conditions are as follow: a glassy carbon disk working electrode (diameter, 3 mm), Pt disk and Ag/AgCl as counter and reference electrode. Cyclic voltammograms of reactants and their mixtures in 0.3 M tetrabutylammonium bromide glassy carbon disk working electrode (diameter, 3 mm), Pt disk and Ag/AgCl (0.1 M in EtOH) as counter and reference electrode at 100 mV/s scan rate: a) 5 mM of **4aa** in MeCN (10 mL) (black line), (2) 5 mM of **5aa** in MeCN (10 mL) (red line).

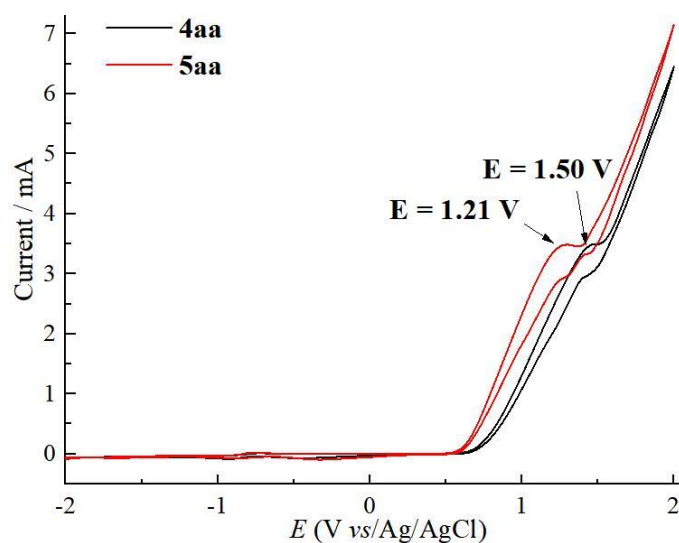

**Figure S7** Cyclic voltammogram experiments of **4aa** and **5aa** in an electrolyte of  $n\text{Bu}_4\text{NBr}$  (0.3 M) in MeCN from -2 V to +2 V at room temperature



## 2.8 Calculation of Apparent Quantum Yield

$$E_{\text{photon}} = \frac{hc}{\lambda_{\text{inc}}(455 \text{ nm})} = \frac{6.63 \times 10^{-34} \text{ J} \cdot \text{s} \times 3 \times 10^8 \text{ m} \cdot \text{s}^{-1}}{455 \times 10^{-9} \text{ m}} = 4.37 \times 10^{-19} \text{ J}$$

$$E_{\text{total}} = PSt = 17.47 \times 10^{-3} \text{ W} \cdot \text{cm}^{-2} \times 4.78 \text{ cm}^2 \times 12 \times 3600 \text{ s} = 3.6 \times 10^3 \text{ J}$$

$$\text{Number of incident photons} = \frac{E_{\text{photon}}}{E_{\text{total}}} = \frac{3.6 \times 10^3 \text{ J}}{4.37 \times 10^{-19} \text{ J}} = 8.24 \times 10^{21} = 13.58 \text{ mmol}$$

$$\text{A.Q.Y}(\%) = \frac{\text{Number of Product}}{\text{Number of incident photons}} = \frac{0.194 \text{ mmol}}{13.58 \text{ mmol}} = 1.4 \% < 1$$

### Figure S8 Apparent Quantum Yield

Where  $h$  ( $\text{J} \cdot \text{s}$ ) is Planck's constant,  $c$  ( $\text{m} \cdot \text{s}^{-1}$ ) is the speed of light and  $\lambda_{\text{inc}}$  ( $\text{m}$ ) is the wavelength of the incident light.  $P$  ( $\text{W} \cdot \text{cm}^{-2}$ ) is the power density of the incident light,  $S$  ( $\text{cm}^2$ ) is the irradiation area and  $t$  ( $\text{s}$ ) is the photoreaction time.

### 3. Characterization data of products

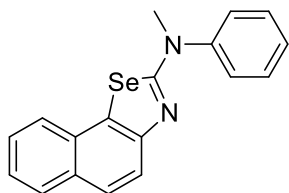

*N*-phenyl-*N*-methylnaphtho[2,1-*d*][1,3]selenazol-2-amine (**4aa**): 97%, yellow oil.  $^1\text{H}$  NMR (500 MHz,  $\text{CDCl}_3$ )  $\delta$  7.85 (d,  $J = 8.0$  Hz, 1H), 7.83-7.75 (m, 2H), 7.50 (d,  $J = 4.4$  Hz, 5H), 7.46-7.33 (m, 3H), 3.69 (s, 3H);  $^{13}\text{C}$  NMR (125 MHz,  $\text{CDCl}_3$ )  $\delta$  169.58, 152.23, 147.08, 130.44, 130.12, 129.77, 129.56, 128.68, 127.64, 126.69, 126.51, 125.89, 125.82, 123.89, 120.81, 40.38; HRMS: calcd for  $\text{C}_{18}\text{H}_{15}\text{N}_2\text{Se}$   $[\text{M}+\text{H}]^+$  339.0395, found 339.0393.

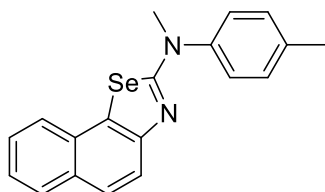

*N*-methyl-*N*-(*p*-tolyl)naphtho[2,1-*d*][1,3]selenazol-2-amine (**4ab**): 87%, yellow oil.  $^1\text{H}$  NMR (500 MHz,  $\text{CDCl}_3$ )  $\delta$  7.85 (d,  $J = 8.1$  Hz, 1H), 7.81 (d,  $J = 8.7$  Hz, 1H), 7.77 (d,  $J = 8.7$  Hz, 1H), 7.48 (d,  $J = 8.1$  Hz, 1H), 7.46-7.39 (m, 1H), 7.38-7.34 (m, 3H), 7.30 (d,  $J = 8.0$  Hz, 2H), 3.66 (s, 3H), 2.43 (s, 3H);  $^{13}\text{C}$  NMR (125 MHz,  $\text{CDCl}_3$ )  $\delta$  169.93, 152.32, 144.58, 137.75, 130.71, 130.42, 129.73, 129.45, 128.64, 126.62, 126.46, 125.84, 125.76, 123.78, 120.72, 40.32, 21.12; HRMS: calcd for  $\text{C}_{19}\text{H}_{17}\text{N}_2\text{Se}$   $[\text{M}+\text{H}]^+$  353.0551, found 353.0545.

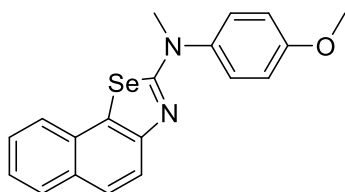

*N*-(4-methoxyphenyl)-*N*-methylnaphtho[2,1-*d*][1,3]selenazol-2-amine (**4ac**): 86%, yellow oil.  $^1\text{H}$  NMR (500 MHz,  $\text{CDCl}_3$ )  $\delta$  7.84 (d,  $J = 8.1$  Hz, 1H), 7.82-7.73 (m, 2H), 7.48 (d,  $J = 8.2$  Hz, 1H), 7.41 (t,  $J = 7.5$  Hz, 1H), 7.38-7.3 (m, 3H), 7.02-6.96 (m, 2H), 3.85 (s, 3H), 3.63 (s, 3H);  $^{13}\text{C}$  NMR (125 MHz,  $\text{CDCl}_3$ )  $\delta$  170.48, 158.98, 152.57, 140.12, 130.50, 129.98, 129.44, 128.64, 127.79, 126.61, 126.45, 125.78, 123.75,

120.78, 115.26, 55.44, 40.41; HRMS: calcd for C<sub>19</sub>H<sub>17</sub>N<sub>2</sub>OSe [M+H]<sup>+</sup> 369.0501, found 369.0501.

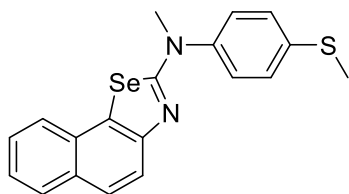

***N*-methyl-*N*-(4-(methylthio)phenyl)naphtho[2,1-*d*][1,3]selenazol-2-amine (4ad):**

84%, black oil. <sup>1</sup>H NMR (500 MHz, DMSO-*d*<sub>6</sub>) δ 7.91 (d, *J* = 8.0 Hz, 1H), 7.81 (d, *J* = 8.7 Hz, 1H), 7.71 (d, *J* = 8.7 Hz, 1H), 7.59 (d, *J* = 7.8 Hz, 1H), 7.53-7.48 (m, 2H), 7.45 (t, *J* = 6.9 Hz, 1H), 7.41-7.34 (m, 3H), 3.54 (s, 3H), 2.52 (s, 3H); <sup>13</sup>C NMR (125 MHz, DMSO-*d*<sub>6</sub>) δ 169.06, 152.19, 143.41, 137.99, 130.01, 129.21, 129.08, 128.65, 127.20, 127.03, 126.79, 126.49, 125.81, 124.13, 120.66, 40.27, 14.66; HRMS: calcd for C<sub>19</sub>H<sub>17</sub>N<sub>2</sub>SSe [M+H]<sup>+</sup> 385.0272, found 385.0275.

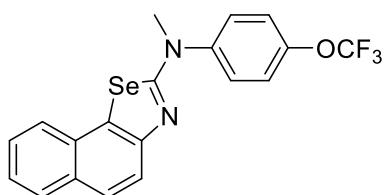

***N*-methyl-*N*-(4-(trifluoromethoxy)phenyl)naphtho[2,1-*d*][1,3]selenazol-2-amine (4ae):**

90%, yellow oil. <sup>1</sup>H NMR (500 MHz, DMSO-*d*<sub>6</sub>) δ 7.93 (d, *J* = 8.1 Hz, 1H), 7.84 (d, *J* = 8.7 Hz, 1H), 7.79-7.74 (d, 2H), 7.72 (d, *J* = 8.7 Hz, 1H), 7.66 (d, *J* = 8.2 Hz, 1H), 7.54 (d, *J* = 8.4 Hz, 2H), 7.51-7.44 (m, 1H), 7.40 (t, *J* = 7.5 Hz, 1H), 3.59 (s, 3H); <sup>13</sup>C NMR (125 MHz, DMSO-*d*<sub>6</sub>) δ 168.58, 151.95, 146.78, 145.35, 129.98, 129.36, 129.19, 128.68, 127.74, 127.12, 126.93, 125.91, 124.33, 122.78, 121.12, 120.75, 119.08 (q, *J* = 257.04 Hz), 40.60. <sup>19</sup>F NMR (471 MHz, DMSO-*d*<sub>6</sub>) δ -56.88; HRMS: calcd for C<sub>19</sub>H<sub>14</sub>F<sub>3</sub>N<sub>2</sub>OSe [M+H]<sup>+</sup> 423.0218, found 423.0217.

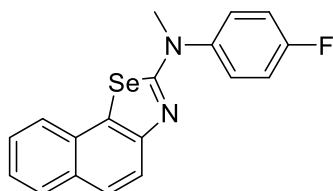

***N*-(4-fluorophenyl)-*N*-methylnaphtho[2,1-*d*][1,3]selenazol-2-amine (4af):** 85%,

black oil. <sup>1</sup>H NMR (500 MHz, CDCl<sub>3</sub>) δ 7.85 (d, *J* = 8.1 Hz, 1H), 7.78 (q, *J* = 8.7 Hz, 2H), 7.49 (d, *J* = 8.1 Hz, 1H), 7.46-7.41 (m, 3H), 7.38-7.35 (m, 1H), 7.22-7.14 (m, 2H), 3.63 (s, 3H); <sup>13</sup>C NMR (125 MHz, CDCl<sub>3</sub>) δ 169.68, 162.51, 160.53 (t, *J* = 10.0

Hz), 152.26, 143.03, 143.00, 136.40, 130.40, 130.02, 129.53, 128.68, 128.22, 128.15 (d,  $J = 8.82$  Hz), 126.77, 126.58 (d,  $J = 23.94$  Hz), 125.79, 123.97, 120.81, 117.12, 116.94 (d,  $J = 22.68$  Hz), 40.54.  $^{19}\text{F}$  NMR (471 MHz,  $\text{CDCl}_3$ )  $\delta$  -112.76; HRMS: calcd for  $\text{C}_{18}\text{H}_{14}\text{FN}_2\text{Se}$   $[\text{M}+\text{H}]^+$  357.0301, found 357.0304.

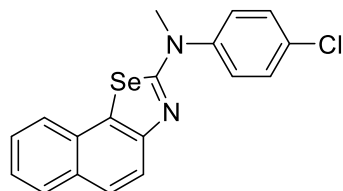

***N*-(4-chlorophenyl)-*N*-methylnaphtho[2,1-*d*][1,3]selenazol-2-amine (4ag):** 84%, yellow oil.  $^1\text{H}$  NMR (500 MHz,  $\text{DMSO-}d_6$ )  $\delta$  7.93 (d,  $J = 8.1$  Hz, 1H), 7.83 (d,  $J = 8.7$  Hz, 1H), 7.72 (d,  $J = 8.7$  Hz, 1H), 7.68-7.62 (m, 3H), 7.60 (d,  $J = 8.7$  Hz, 2H), 7.51-7.44 (m, 1H), 7.42-7.39 (m, 1H), 3.58 (s, 3H);  $^{13}\text{C}$  NMR (125 MHz,  $\text{DMSO-}d_6$ )  $\delta$  168.61, 151.98, 145.28, 131.70, 130.15, 129.96, 129.30, 129.16, 128.67, 127.65, 127.10, 126.89, 125.85, 124.28, 120.72, 40.43; HRMS: calcd for  $\text{C}_{18}\text{H}_{14}\text{ClN}_2\text{Se}$   $[\text{M}+\text{H}]^+$  373.0005, found 373.0007.

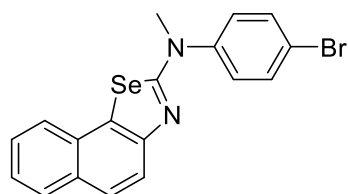

***N*-(4-bromophenyl)-*N*-methylnaphtho[2,1-*d*][1,3]selenazol-2-amine (4ah):** 80%, yellow oil.  $^1\text{H}$  NMR (500 MHz,  $\text{DMSO-}d_6$ )  $\delta$  7.93 (d,  $J = 8.1$  Hz, 1H), 7.83 (d,  $J = 8.7$  Hz, 1H), 7.74-7.71 (m, 3H), 7.63 (d,  $J = 8.2$  Hz, 1H), 7.60-7.52 (m, 2H), 7.51-7.44 (m, 1H), 7.41-7.38 (m, 1H), 3.57 (d,  $J = 1.1$  Hz, 3H);  $^{13}\text{C}$  NMR (125 MHz,  $\text{DMSO-}d_6$ )  $\delta$  168.48, 151.95, 145.68, 133.07, 129.96, 129.31, 129.17, 128.68, 127.86, 127.10, 126.89, 125.85, 124.29, 120.72, 120.03, 40.40; HRMS: calcd for  $\text{C}_{18}\text{H}_{14}\text{BrN}_2\text{Se}$   $[\text{M}+\text{H}]^+$  416.9500, found 416.9503.

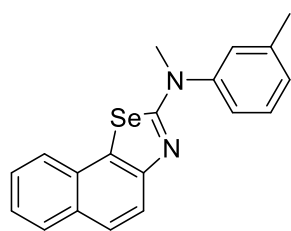

***N*-methyl-*N*-(*m*-tolyl)naphtho[2,1-*d*][1,3]selenazol-2-amine (4ai)**: 88%, yellow oil. <sup>1</sup>H NMR (500 MHz, DMSO-*d*<sub>6</sub>) δ 7.91 (d, *J* = 8.1 Hz, 1H), 7.81 (d, *J* = 8.7 Hz, 1H), 7.71 (d, *J* = 8.7 Hz, 1H), 7.59 (d, *J* = 8.2 Hz, 1H), 7.50-7.31 (m, 5H), 7.23 (d, *J* = 7.5 Hz, 1H), 3.57 (s, 3H), 2.36 (s, 3H); <sup>13</sup>C NMR (125 MHz, DMSO-*d*<sub>6</sub>) δ 168.92, 152.11, 146.65, 139.94, 130.04, 130.01, 129.09, 129.02, 128.63, 128.43, 126.97, 126.74, 126.11, 125.82, 124.09, 122.66, 120.65, 40.21, 20.93; HRMS: calcd for C<sub>19</sub>H<sub>17</sub>N<sub>2</sub>Se [M+H]<sup>+</sup> 353.0551, found 353.0549.

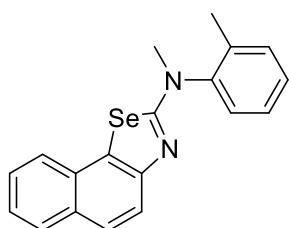

***N*-methyl-*N*-(*o*-tolyl)naphtho[2,1-*d*][1,3]selenazol-2-amine (4aj)**: 83%, yellow oil, <sup>1</sup>H NMR (500 MHz, CDCl<sub>3</sub>) δ 7.87-7.74 (m, 3H), 7.46-7.31 (m, 7H), 3.60 (s, 3H), 2.34 (s, 3H); <sup>13</sup>C NMR (125 MHz, CDCl<sub>3</sub>) δ 170.22, 152.61, 145.30, 136.61, 132.15, 130.53, 130.24, 129.29, 129.14, 128.66, 128.47, 128.08, 126.67, 126.48, 125.74, 123.75, 120.72, 39.26, 17.44; HRMS: calcd for C<sub>19</sub>H<sub>17</sub>N<sub>2</sub>Se [M+H]<sup>+</sup> 353.0551, found 353.0555.

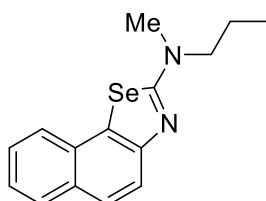

***Methyl-N*-propylnaphtho[2,1-*d*][1,3]selenazol-2-amine (4ak)**: 98%, yellow oil. <sup>1</sup>H NMR (500 MHz, CDCl<sub>3</sub>) δ 7.75-7.74 (m, 1H), 7.64 (s, 2H), 7.50-7.48 (m, 1H), 7.38-7.35 (m, 1H), 7.27-7.24 (m, 1H), 3.39-3.37 (t, *J* = 5 Hz, 2H), 3.11 (s, 3H), 1.68-1.64 (m, 2H), 0.91-0.88 (t, *J* = 7.5 Hz, 3H); <sup>13</sup>C NMR (125 MHz, CDCl<sub>3</sub>) δ 169.47, 152.87, 130.71, 129.37, 129.14, 128.79, 126.76, 126.60, 125.81, 123.63, 120.73, 56.59, 38.84, 20.63, 11.39; HRMS: calcd for C<sub>15</sub>H<sub>17</sub>N<sub>2</sub>Se [M+H]<sup>+</sup> 305.0551, found 305.0553.

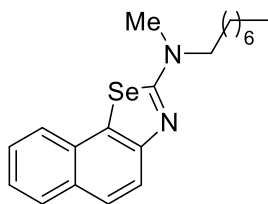

**Methyl-*N*-octylnaphtho[2,1-*d*][1,3]selenazol-2-amine (4al):** 90%, yellow oil.  $^1\text{H}$  NMR (500 MHz,  $\text{CDCl}_3$ )  $\delta$  7.89-7.77 (m, 3H), 7.64-7.62 (m, 1H), 7.51-7.48 (m, 1H), 7.40-7.37 (m, 1H), 3.55-3.52 (t,  $J = 7.5$  Hz, 2H), 3.24 (s, 3H), 1.77-1.72 (m, 2H), 1.39-1.32 (m, 10H), 0.94-0.91 (t,  $J = 7.5$  Hz, 3H);  $^{13}\text{C}$  NMR (125 MHz,  $\text{CDCl}_3$ )  $\delta$  169.38, 152.85, 130.72, 129.35, 129.14, 128.78, 126.74, 126.58, 125.81, 123.62, 120.73, 55.07, 38.75, 31.85, 29.40, 29.28, 27.29, 26.90, 22.69, 14.16; HRMS: calcd for  $\text{C}_{20}\text{H}_{27}\text{N}_2\text{Se}$   $[\text{M}+\text{H}]^+$  375.1334, found 375.1330.

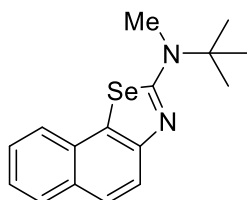

**(*tert*-butyl)-*N*-methylnaphtho[2,1-*d*][1,3]selenazol-2-amine (4am):** 95%, yellow oil.  $^1\text{H}$  NMR (500 MHz,  $\text{CDCl}_3$ )  $\delta$  7.90-7.68 (m, 4H), 7.52-7.39 (m, 2H), 3.18 (s, 3H), 1.67 (s, 9H);  $^{13}\text{C}$  NMR (125 MHz,  $\text{CDCl}_3$ )  $\delta$  168.84, 152.63, 130.60, 129.78, 129.21, 128.75, 126.47, 126.41, 126.32, 123.64, 121.22, 59.37, 39.13, 28.31; HRMS: calcd for  $\text{C}_{16}\text{H}_{19}\text{N}_2\text{Se}$   $[\text{M}+\text{H}]^+$  319.0708, found 319.0713.

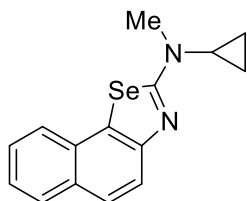

***N*-cyclopropyl-*N*-methylnaphtho[2,1-*d*][1,3]selenazol-2-amine (4an):** 92%, yellow oil.  $^1\text{H}$  NMR (500 MHz,  $\text{CDCl}_3$ )  $\delta$  7.90-7.37 (m, 6H), 3.39-3.31 (m, 3H), 2.82-2.27 (m, 1H), 0.98-0.91 (m, 4H);  $^{13}\text{C}$  NMR (125 MHz,  $\text{CDCl}_3$ )  $\delta$  171.52, 152.17, 130.65, 129.91, 129.32, 128.78, 126.61, 126.56, 125.95, 123.86, 121.00, 38.48, 36.18, 8.89; HRMS: calcd for  $\text{C}_{15}\text{H}_{15}\text{N}_2\text{Se}$   $[\text{M}+\text{H}]^+$  303.0395, found 303.0399.

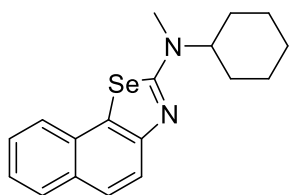

***N-cyclohexyl-N-methylnaphtho[2,1-d][1,3]selenazol-2-amine (4ao)***: 65%, yellow oil.  $^1\text{H}$  NMR (500 MHz,  $\text{CDCl}_3$ )  $\delta$  7.85 (d,  $J = 8.1$  Hz, 1H), 7.74 (s, 2H), 7.60 (d,  $J = 8.2$  Hz, 1H), 7.50-7.44 (m, 1H), 7.36 (t,  $J = 7.5$  Hz, 1H), 3.85 (s, 1H), 3.11 (s, 3H), 1.97-1.87 (m, 4H), 1.75-1.71 (m, 1H), 1.60-1.41 (m, 4H), 1.21-1.11 (m, 1H);  $^{13}\text{C}$  NMR (125 MHz,  $\text{CDCl}_3$ )  $\delta$  169.77, 152.58, 130.57, 129.00, 128.68, 128.59, 126.62, 126.46, 125.66, 123.47, 120.60, 62.23, 33.28, 30.09, 25.75, 25.40; HRMS: calcd for  $\text{C}_{18}\text{H}_{21}\text{N}_2\text{Se}$   $[\text{M}+\text{H}]^+$  345.0864, found 345.0867.

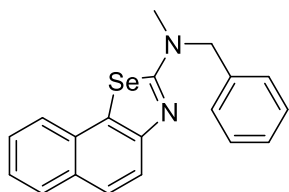

***N-benzyl-N-methylnaphtho[2,1-d][1,3]selenazol-2-amine (4ap)***: 72%, yellow oil.  $^1\text{H}$  NMR (500 MHz,  $\text{CDCl}_3$ )  $\delta$  7.87 (d,  $J = 8.1$  Hz, 1H), 7.78 (s, 2H), 7.61 (d,  $J = 8.1$  Hz, 1H), 7.48 (t,  $J = 7.5$  Hz, 1H), 7.41-7.28 (m, 6H), 4.81 (s, 2H), 3.18 (s, 3H);  $^{13}\text{C}$  NMR (125 MHz,  $\text{CDCl}_3$ )  $\delta$  169.96, 152.60, 136.20, 130.60, 129.71, 129.17, 128.75, 128.72, 127.73, 127.54, 126.80, 126.59, 125.74, 123.72, 120.75, 57.45, 38.90; HRMS: calcd for  $\text{C}_{19}\text{H}_{17}\text{N}_2\text{Se}$   $[\text{M}+\text{H}]^+$  353.0551, found 353.0551.

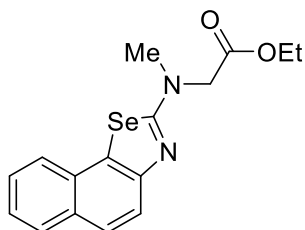

***Ethyl N-methyl-N-(naphtho[2,1-d][1,3]selenazol-2-yl)glycinate (4aq)***: 88%, light yellow oil.  $^1\text{H}$  NMR (500 MHz,  $\text{CDCl}_3$ )  $\delta$  7.89-7.35 (m, 6H), 4.44 (s, 2H), 4.28-4.22 (m, 2H), 3.29-3.23 (m, 3H), 1.32-1.27 (m, 3H);  $^{13}\text{C}$  NMR (125 MHz,  $\text{CDCl}_3$ )  $\delta$  169.60, 169.12, 152.40, 130.62, 129.31, 128.79, 126.83, 126.68, 125.87, 125.84,

123.96, 121.05, 61.43, 53.74, 41.07, 14.25; HRMS: calcd for C<sub>16</sub>H<sub>17</sub>N<sub>2</sub>O<sub>2</sub>Se [M+H]<sup>+</sup> 349.0450, found 349.0447.

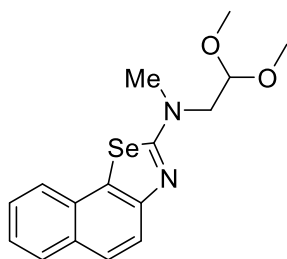

***N*-(2,2-dimethoxyethyl)-*N*-methylnaphtho[2,1-*d*][1,3]selenazol-2-amine (4ar)**: 95%, white oil. <sup>1</sup>H NMR (500 MHz, CDCl<sub>3</sub>) δ 7.76-7.75 (d, *J* = 5 Hz, 1H), 7.65 (d, *J* = 5 Hz, 2H), 7.52-7.50 (d, *J* = 10 Hz, 1H), 7.39-7.36 (t, *J* = 7.5 Hz, 1H), 7.28-7.25 (t, *J* = 7.5 Hz, 1H), 4.63-4.60 (t, *J* = 7.5 Hz, 1H), 3.60-3.59 (d, *J* = 5 Hz, 2H), 3.36 (s, 6H), 3.16 (s, 3H); <sup>13</sup>C NMR (125 MHz, CDCl<sub>3</sub>) δ 169.40, 152.74, 130.68, 129.83, 129.19, 128.79, 126.80, 126.66, 125.85, 123.79, 120.89, 102.98, 55.81, 55.04, 41.31; HRMS: calcd for C<sub>16</sub>H<sub>19</sub>N<sub>2</sub>O<sub>2</sub>Se [M+H]<sup>+</sup> 351.0606, found 351.0607.

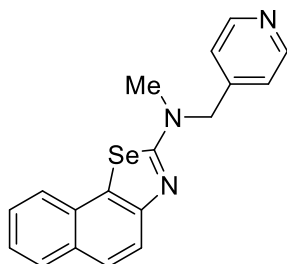

***Methyl-N*-(pyridin-4-ylmethyl)naphtho[2,1-*d*][1,3]selenazol-2-amine (4as)**: 70%, yellow oil. <sup>1</sup>H NMR (500 MHz, CDCl<sub>3</sub>) δ 8.60-8.54 (m, 2H), 7.89-7.20 (m, 8H), 4.85 (s, 2H), 3.18 (s, 3H); <sup>13</sup>C NMR (125 MHz, CDCl<sub>3</sub>) δ 169.72, 152.48, 150.20, 145.77, 130.62, 130.23, 129.34, 128.84, 127.03, 126.81, 125.81, 124.05, 122.36, 120.89, 55.70, 39.75; HRMS: calcd for C<sub>18</sub>H<sub>16</sub>N<sub>3</sub>Se [M+H]<sup>+</sup> 354.0504, found 354.0500.

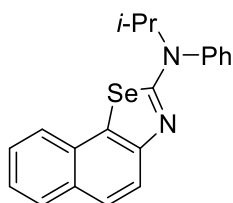

***Isopropyl-N*-phenylnaphtho[2,1-*d*][1,3]selenazol-2-amine (4at)**: 72%, yellow oil. <sup>1</sup>H NMR (500 MHz, CDCl<sub>3</sub>) δ 7.75-7.65 (m, 3H), 7.48-7.43 (m, 3H), 7.35-7.17 (m, 5H),



5.20-5.14 (m, 1H), 1.21 (s, 6H);  $^{13}\text{C}$  NMR (125 MHz,  $\text{CDCl}_3$ )  $\delta$  170.81, 152.60, 142.20, 130.94, 130.51, 130.16, 129.57, 129.35, 129.16, 128.70, 126.63, 126.45, 125.88, 123.68, 120.85, 51.42, 21.26; HRMS: calcd for  $\text{C}_{20}\text{H}_{19}\text{N}_2\text{Se}$   $[\text{M}+\text{H}]^+$  367.0708, found 367.0710.

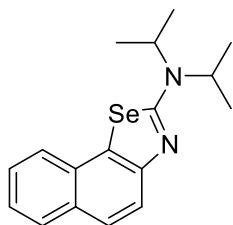

***N,N*-diisopropyl-naphtho[2,1-*d*][1,3]selenazol-2-amine (4au)**: 84%, yellow solid.  $^1\text{H}$  NMR (500 MHz,  $\text{DMSO-}d_6$ )  $\delta$  7.91 (d,  $J = 8.1$  Hz, 1H), 7.77 (d,  $J = 8.7$  Hz, 1H), 7.63-7.61 (m, 2H), 7.51-7.49 (m, 1H), 7.38-7.35 (m, 1H), 3.88-3.80 (m, 2H), 1.42 (d,  $J = 6.7$  Hz, 12H);  $^{13}\text{C}$  NMR (125 MHz,  $\text{DMSO-}d_6$ )  $\delta$  165.68, 152.77, 130.05, 128.69, 128.49, 127.34, 126.94, 126.49, 125.75, 123.58, 120.47, 19.97; HRMS: calcd for  $\text{C}_{17}\text{H}_{21}\text{N}_2\text{Se}$   $[\text{M}+\text{H}]^+$  333.0864, found 333.0867.

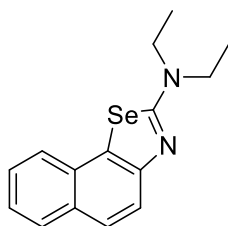

***N,N*-diethylnaphtho[2,1-*d*][1,3]selenazol-2-amine (4av)**: 90%, yellow oil.  $^1\text{H}$  NMR (500 MHz,  $\text{CDCl}_3$ )  $\delta$  7.88-7.82 (m, 1H), 7.74 (s, 2H), 7.59 (d,  $J = 8.2$  Hz, 1H), 7.50-7.44 (m, 1H), 7.39-7.32 (m, 1H), 3.60 (q,  $J = 7.2$  Hz, 4H), 1.33 (t,  $J = 7.2$  Hz, 6H);  $^{13}\text{C}$  NMR (125 MHz,  $\text{CDCl}_3$ )  $\delta$  168.21, 152.81, 130.65, 129.03, 128.94, 128.69, 126.58, 126.46, 125.74, 123.46, 120.59, 46.55, 12.86; HRMS: calcd for  $\text{C}_{15}\text{H}_{17}\text{N}_2\text{Se}$   $[\text{M}+\text{H}]^+$  305.0551, found 305.0552.

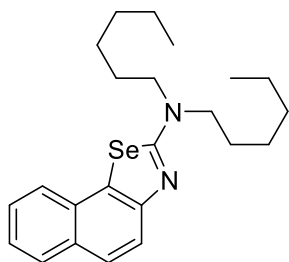

***N,N*-dihexylnaphtho[2,1-*d*][1,3]selenazol-2-amine (4aw)**: 70%, yellow oil.  $^1\text{H}$  NMR (500 MHz,  $\text{DMSO-}d_6$ )  $\delta$  7.90 (d,  $J = 8.2$  Hz, 1H), 7.77 (d,  $J = 8.7$  Hz, 1H), 7.62 (t,  $J = 8.3$  Hz, 2H), 7.49 (t,  $J = 7.5$  Hz, 1H), 7.36 (t,  $J = 7.5$  Hz, 1H), 3.46 (t,  $J = 7.5$  Hz, 4H), 1.65 (t,  $J = 7.4$  Hz, 4H), 1.28 (q,  $J = 7.8, 7.0$  Hz, 12H), 0.88-0.82 (m, 6H);  $^{13}\text{C}$  NMR (125 MHz,  $\text{DMSO-}d_6$ )  $\delta$  168.15, 152.63, 130.19, 128.68, 128.55, 128.31, 126.98, 126.63, 125.59, 123.68, 120.41, 31.03, 27.01, 26.00, 22.11, 13.94; HRMS: calcd for  $\text{C}_{23}\text{H}_{33}\text{N}_2\text{Se}$   $[\text{M}+\text{H}]^+$  417.1803, found 417.1805.

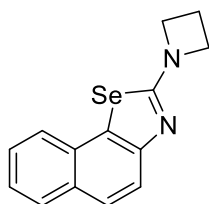

**2-(azetidin-1-yl)naphtho[2,1-*d*][1,3]selenazole (4ax)**: 98%, white oil.  $^1\text{H}$  NMR (500 MHz,  $\text{CDCl}_3$ )  $\delta$  7.84 (d,  $J = 8.1$  Hz, 1H), 7.75 (s, 2H), 7.58 (d,  $J = 8.2$  Hz, 1H), 7.46 (t,  $J = 7.5$  Hz, 1H), 7.36 (t,  $J = 7.5$  Hz, 1H), 4.20 (t,  $J = 7.5$  Hz, 4H), 2.53-2.47 (m, 2H);  $^{13}\text{C}$  NMR (125 MHz,  $\text{CDCl}_3$ )  $\delta$  169.39, 152.54, 130.80, 130.46, 129.27, 128.79, 126.90, 126.70, 125.96, 123.92, 120.76, 53.60, 17.24; HRMS: calcd for  $\text{C}_{14}\text{H}_{13}\text{N}_2\text{Se}$   $[\text{M}+\text{H}]^+$  289.0238, found 289.0236.

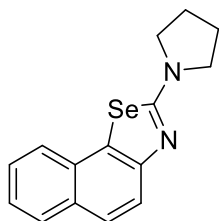

**2-(pyrrolidin-1-yl)naphtho[2,1-*d*][1,3]selenazole (4ay)**: 75%, yellow oil.  $^1\text{H}$  NMR (500 MHz,  $\text{CDCl}_3$ )  $\delta$  7.85 (d,  $J = 8.1$  Hz, 1H), 7.81-7.72 (m, 2H), 7.60 (d,  $J = 8.2$  Hz, 1H), 7.47 (t,  $J = 7.5$  Hz, 1H), 7.36 (t,  $J = 7.5$  Hz, 1H), 3.58 (d,  $J = 6.4$  Hz, 4H), 2.11-2.03 (m, 4H);  $^{13}\text{C}$  NMR (125 MHz,  $\text{CDCl}_3$ )  $\delta$  166.00, 152.76, 130.69, 129.18, 128.94, 128.67, 126.71, 126.48, 125.72, 123.50, 120.62, 50.41, 25.60; HRMS: calcd for  $\text{C}_{15}\text{H}_{15}\text{N}_2\text{Se}$   $[\text{M}+\text{H}]^+$  303.0395, found 303.0394.

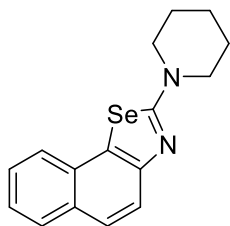

**2-(piperidin-1-yl)naphtho[2,1-d][1,3]selenazole (4az):** 95%, white oil.  $^1\text{H}$  NMR (500 MHz,  $\text{CDCl}_3$ )  $\delta$  7.83 (d,  $J = 8.1$  Hz, 1H), 7.77-7.67 (m, 2H), 7.58 (d,  $J = 8.2$  Hz, 1H), 7.45 (t,  $J = 7.5$  Hz, 1H), 7.34 (t,  $J = 7.5$  Hz, 1H), 3.60 (t,  $J = 5.2$  Hz, 4H), 1.73-1.68 (m, 6H);  $^{13}\text{C}$  NMR (125 MHz,  $\text{CDCl}_3$ )  $\delta$  170.16, 152.60, 130.67, 129.34, 129.26, 128.79, 126.77, 126.60, 125.85, 123.74, 120.76, 51.01, 25.46, 24.36; HRMS: calcd for  $\text{C}_{16}\text{H}_{17}\text{N}_2\text{Se}$   $[\text{M}+\text{H}]^+$  317.0551, found 317.0555.

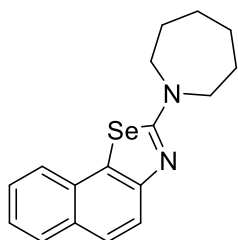

**2-(azepan-1-yl)naphtho[2,1-d][1,3]selenazole (4aA):** 84%, yellow oil.  $^1\text{H}$  NMR (500 MHz,  $\text{CDCl}_3$ )  $\delta$  7.85 (d,  $J = 8.1$  Hz, 1H), 7.75 (s, 2H), 7.60 (d,  $J = 8.1$  Hz, 1H), 7.47 (t,  $J = 7.5$  Hz, 1H), 7.36 (t,  $J = 7.5$  Hz, 1H), 3.68 (t,  $J = 6.1$  Hz, 4H), 1.95-1.81 (m, 4H), 1.65-1.61 (m, 4H);  $^{13}\text{C}$  NMR (125 MHz,  $\text{CDCl}_3$ )  $\delta$  169.08, 152.81, 130.60, 128.93, 128.78, 128.65, 126.58, 126.43, 125.68, 123.40, 120.56, 51.90, 27.83, 27.52; HRMS: calcd for  $\text{C}_{17}\text{H}_{19}\text{N}_2\text{Se}$   $[\text{M}+\text{H}]^+$  331.0708, found 331.0706.

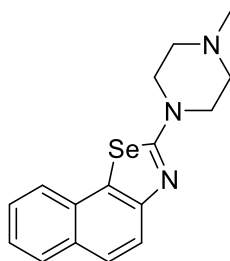

**2-(4-methylpiperazin-1-yl)naphtho[2,1-d][1,3]selenazole (4aB):** 70%, yellow oil.  $^1\text{H}$  NMR (500 MHz,  $\text{DMSO}-d_6$ )  $\delta$  7.93 (d,  $J = 8.1$  Hz, 1H), 7.81 (d,  $J = 8.6$  Hz, 1H), 7.65 (t,  $J = 7.7$  Hz, 2H), 7.52 (t,  $J = 7.5$  Hz, 1H), 7.40 (t,  $J = 7.5$  Hz, 1H), 3.57 (t,  $J = 5.1$  Hz, 4H), 2.45 (t,  $J = 5.1$  Hz, 4H), 2.23 (s, 3H);  $^{13}\text{C}$  NMR (125 MHz,  $\text{DMSO}-d_6$ )  $\delta$

169.59, 152.16, 130.13, 129.08, 128.82, 128.76, 127.14, 126.84, 125.71, 124.11, 120.62, 53.88, 49.19, 45.68; HRMS: calcd for C<sub>16</sub>H<sub>18</sub>N<sub>3</sub>Se [M+H]<sup>+</sup> 332.0660, found 332.0661.

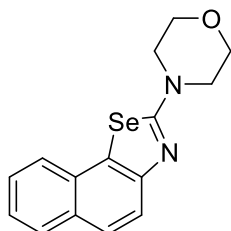

**4-(naphtho[2,1-d][1,3]selenazol-2-yl)morpholine (4aC)**: 85%, yellow oil. <sup>1</sup>H NMR (500 MHz, CDCl<sub>3</sub>) δ 7.87 (d, *J* = 8.1 Hz, 1H), 7.75 (q, *J* = 8.7 Hz, 2H), 7.62 (d, *J* = 8.2 Hz, 1H), 7.49 (t, *J* = 7.5 Hz, 1H), 7.39 (t, *J* = 7.5 Hz, 1H), 3.85 (t, *J* = 5.0 Hz, 4H), 3.66-3.61 (m, 4H); <sup>13</sup>C NMR (125 MHz, CDCl<sub>3</sub>) δ 170.37, 151.98, 130.47, 129.66, 129.38, 128.76, 126.94, 126.69, 125.80, 124.07, 120.84, 66.24, 49.63; HRMS: calcd for C<sub>15</sub>H<sub>15</sub>N<sub>2</sub>OSe [M+H]<sup>+</sup> 319.0344, found 319.0347.

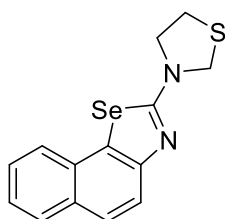

**3-(naphtho[2,1-d][1,3]selenazol-2-yl)thiazolidine (4aD)**: 95%, white oil. <sup>1</sup>H NMR (500 MHz, CDCl<sub>3</sub>) δ 7.87 (d, *J* = 8.1 Hz, 1H), 7.77 (s, 2H), 7.61 (d, *J* = 8.1 Hz, 1H), 7.51-7.48 (m, 1H), 7.41-7.38 (m, 1H), 4.73 (s, 2H), 3.92 (t, *J* = 6.2 Hz, 2H), 3.22 (t, *J* = 6.2 Hz, 2H); <sup>13</sup>C NMR (125 MHz, CDCl<sub>3</sub>) δ 165.76, 152.16, 130.63, 130.29, 129.43, 128.83, 127.08, 126.79, 125.86, 124.15, 120.96, 53.66, 52.42, 30.69; HRMS: calcd for C<sub>14</sub>H<sub>13</sub>N<sub>2</sub>SSe [M+H]<sup>+</sup> 320.9959, found 320.9955.

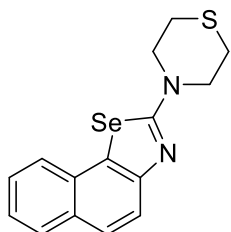

**4-(naphtho[2,1-d][1,3]selenazol-2-yl)thiomorpholine (4aE)**: 95%, white solid. <sup>1</sup>H NMR (500 MHz, CDCl<sub>3</sub>) δ 7.84 (d, *J* = 8.1 Hz, 1H), 7.74 (d, *J* = 8.7 Hz, 1H), 7.69 (d,

$J = 8.7$  Hz, 1H), 7.58 (d,  $J = 8.2$  Hz, 1H), 7.47 (t,  $J = 7.5$  Hz, 1H), 7.37 (t,  $J = 7.5$  Hz, 1H), 4.00-3.93 (m, 4H), 2.81-2.74 (m, 4H);  $^{13}\text{C}$  NMR (125 MHz,  $\text{CDCl}_3$ )  $\delta$  169.36, 152.24, 130.57, 129.78, 129.42, 128.84, 126.98, 126.76, 125.82, 124.06, 120.86, 52.65, 26.79; HRMS: calcd for  $\text{C}_{15}\text{H}_{15}\text{N}_2\text{SSe}$   $[\text{M}+\text{H}]^+$  335.0116, found 335.0119.

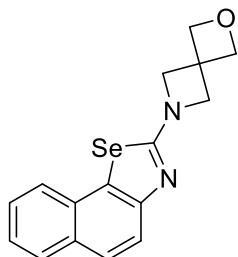

**6-(naphtho[2,1-d][1,3]selenazol-2-yl)-2-oxa-6-azaspiro[3.3]heptane (4aF):** 96%, white oil.  $^1\text{H}$  NMR (500 MHz,  $\text{CDCl}_3$ )  $\delta$  7.86 (d,  $J = 8.1$  Hz, 1H), 7.76 (s, 2H), 7.59 (d,  $J = 8.1$  Hz, 1H), 7.48 (t,  $J = 7.5$  Hz, 1H), 7.39 (t,  $J = 7.5$  Hz, 1H), 4.86 (s, 3H), 4.33 (s, 3H);  $^{13}\text{C}$  NMR (125 MHz,  $\text{CDCl}_3$ )  $\delta$  169.04, 152.18, 130.95, 130.71, 129.45, 128.84, 127.09, 126.84, 125.97, 124.24, 120.83, 80.77, 62.86, 39.73; HRMS: calcd for  $\text{C}_{16}\text{H}_{15}\text{N}_2\text{OSe}$   $[\text{M}+\text{H}]^+$  331.0344, found 331.0347.

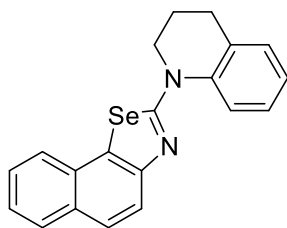

**2-(3,4-dihydroquinolin-1(2H)-yl)naphtho[2,1-d][1,3]selenazole (4aG):** 97%, yellow oil.  $^1\text{H}$  NMR (500 MHz,  $\text{CDCl}_3$ )  $\delta$  7.87 (d,  $J = 8.1$  Hz, 1H), 7.77 (d,  $J = 8.1$  Hz, 1H), 7.74-7.65 (m, 2H), 7.49 (d,  $J = 8.2$  Hz, 1H), 7.37 (t,  $J = 7.5$  Hz, 1H), 7.33-7.26 (m, 1H), 7.20-7.13 (m, 1H), 7.10 (d,  $J = 7.4$  Hz, 1H), 7.03 (t,  $J = 7.4$  Hz, 1H), 4.05 (t,  $J = 6.2$  Hz, 2H), 2.72 (t,  $J = 6.4$  Hz, 2H), 2.04-1.95 (m, 2H);  $^{13}\text{C}$  NMR (125 MHz,  $\text{CDCl}_3$ )  $\delta$  167.88, 151.23, 141.41, 131.00, 130.37, 129.89, 129.11, 128.99, 128.71, 126.81, 126.70, 126.62, 125.96, 124.50, 124.18, 120.96, 120.51, 49.80, 27.35, 23.45; HRMS: calcd for  $\text{C}_{20}\text{H}_{17}\text{N}_2\text{Se}$   $[\text{M}+\text{H}]^+$  365.0551, found 365.0556.

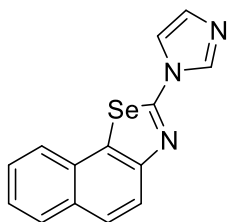

**2-(1H-imidazol-1-yl)naphtho[2,1-d][1,3]selenazole (4aH):** 60%, yellow oil.  $^1\text{H}$  NMR (500 MHz, DMSO- $d_6$ )  $\delta$  8.62 (s, 1H), 8.10 (d,  $J = 8.0$  Hz, 1H), 8.04 (dd,  $J = 5.5, 3.0$  Hz, 4H), 7.68 (t,  $J = 7.4$  Hz, 1H), 7.62 (t,  $J = 7.5$  Hz, 1H), 7.23 (d,  $J = 1.4$  Hz, 1H);  $^{13}\text{C}$  NMR (125 MHz, DMSO- $d_6$ )  $\delta$  157.75, 149.25, 136.90, 134.31, 130.96, 130.55, 129.73, 128.96, 127.97, 127.86, 126.59, 126.49, 122.13, 118.96; HRMS: calcd for  $\text{C}_{14}\text{H}_{10}\text{N}_3\text{Se}$   $[\text{M}+\text{H}]^+$  300.0034, found 300.0034.

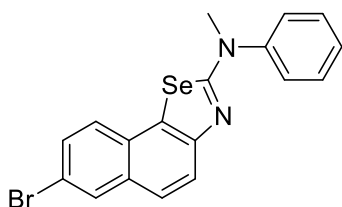

**7-bromo-N-methyl-N-phenylnaphtho[2,1-d][1,3]selenazol-2-amine (4ba):** 73%, yellow oil,  $^1\text{H}$  NMR (500 MHz, DMSO- $d_6$ )  $\delta$  8.22 (s, 1H), 7.83 (d,  $J = 8.7$  Hz, 1H), 7.76 (d,  $J = 8.7$  Hz, 1H), 7.65-7.59 (m, 3H), 7.59-7.54 (m, 3H), 7.47-7.42 (m, 1H), 3.60 (s, 3H);  $^{13}\text{C}$  NMR (126 MHz, DMSO- $d_6$ )  $\delta$  169.39, 152.69, 146.56, 130.49, 130.37, 129.73, 129.07, 128.60, 128.03, 127.95, 126.10, 125.83, 121.72, 116.81, 40.37; HRMS: calcd for  $\text{C}_{18}\text{H}_{14}\text{BrN}_2\text{Se}$   $[\text{M}+\text{H}]^+$  416.9500, found 416.9503.

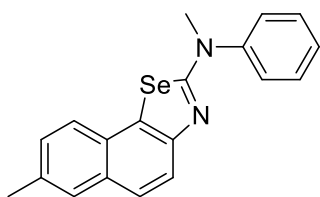

**N,7-dimethyl-N-phenylnaphtho[2,1-d][1,3]selenazol-2-amine (4ca):** 84%, yellow oil.  $^1\text{H}$  NMR (500 MHz, DMSO- $d_6$ )  $\delta$  7.78-7.64 (m, 3H), 7.62-7.49 (m, 5H), 7.42 (t,  $J = 7.3$  Hz, 1H), 7.31 (d,  $J = 8.3$  Hz, 1H), 3.59 (s, 3H), 2.44 (s, 3H);  $^{13}\text{C}$  NMR (125 MHz, DMSO- $d_6$ )  $\delta$  168.43, 151.44, 146.66, 133.28, 130.20, 129.29, 129.02, 128.99, 128.14, 127.63, 127.53, 126.11, 125.70, 125.68, 120.60, 40.26, 21.02; HRMS: calcd for  $\text{C}_{19}\text{H}_{17}\text{N}_2\text{Se}$   $[\text{M}+\text{H}]^+$  353.0551, found 353.0549.

#### **4. Reference**

1. H. Liu, Z.-L. Ye, Z.-J. Cai and S.-J. Ji, *Green Chem.*, 2023, **25**, 4239.
2. Y. Fang, Z.-L. Zhu, P. Xu, S.-Y. Wang and S.-J. Ji, *Green Chem.*, 2017, **19**, 1613.

## 5. $^1\text{H}$ , $^{19}\text{F}$ and $^{13}\text{C}$ NMR spectra of products

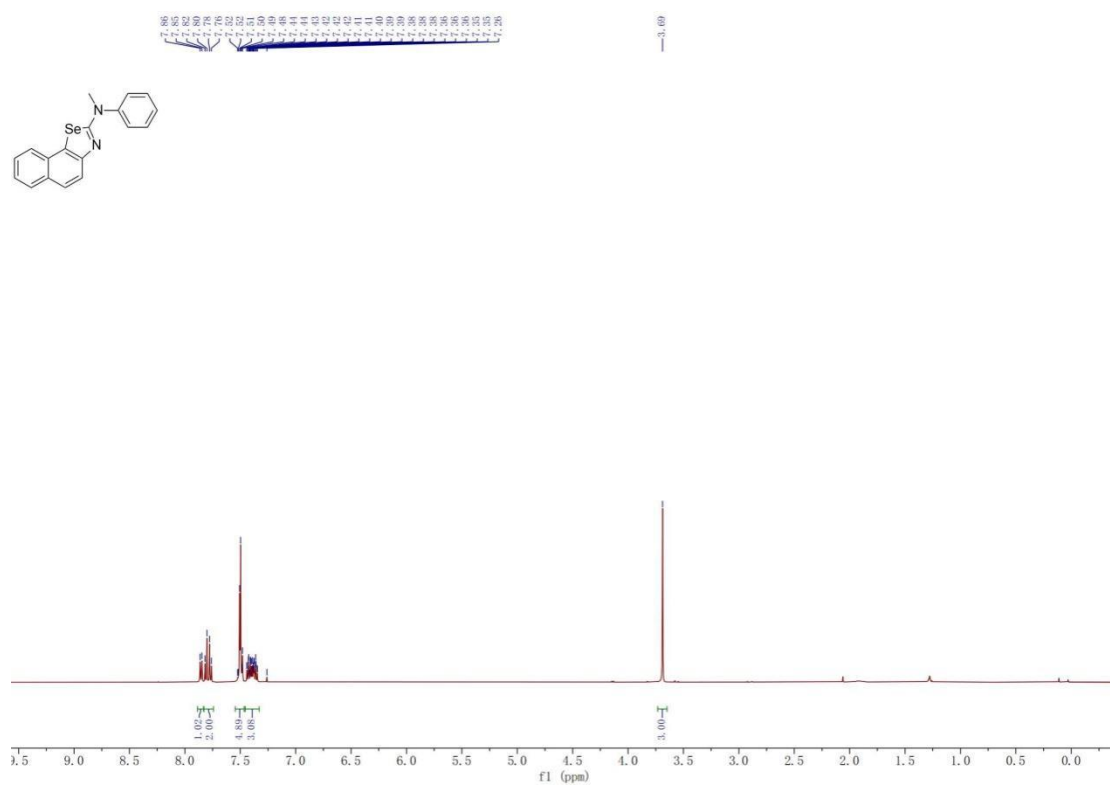

$^1\text{H}$  NMR of compound **4aa**

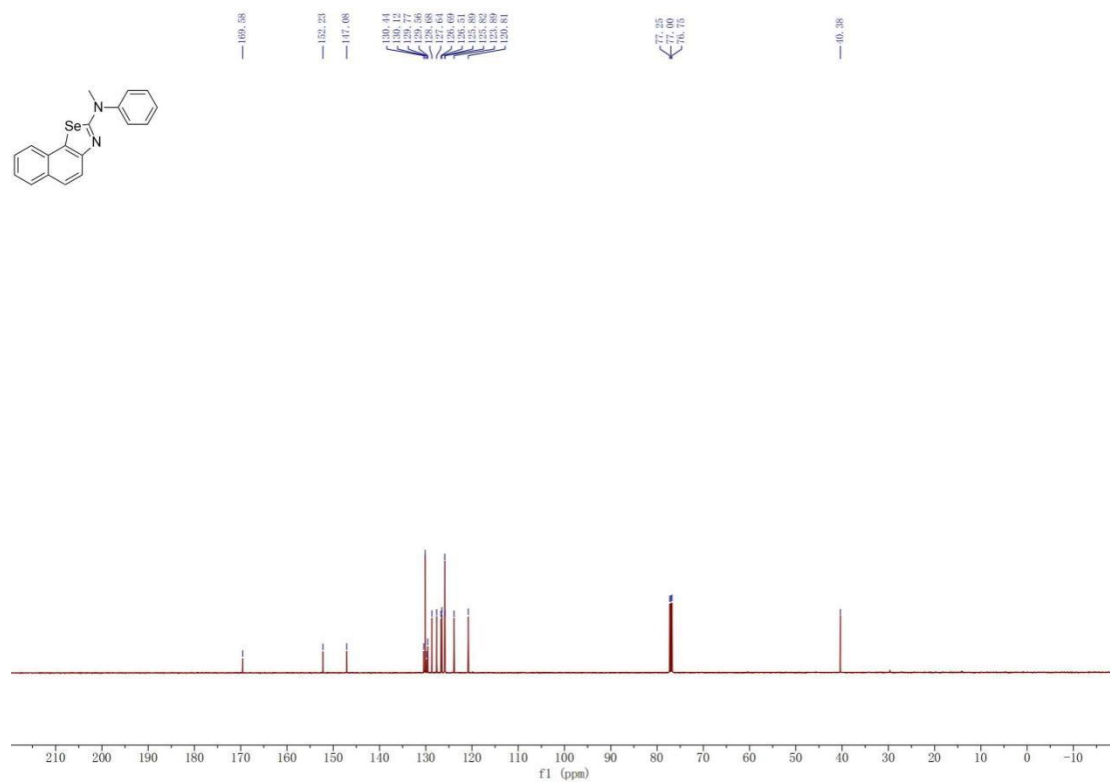

$^{13}\text{C}$  NMR of compound **4aa**





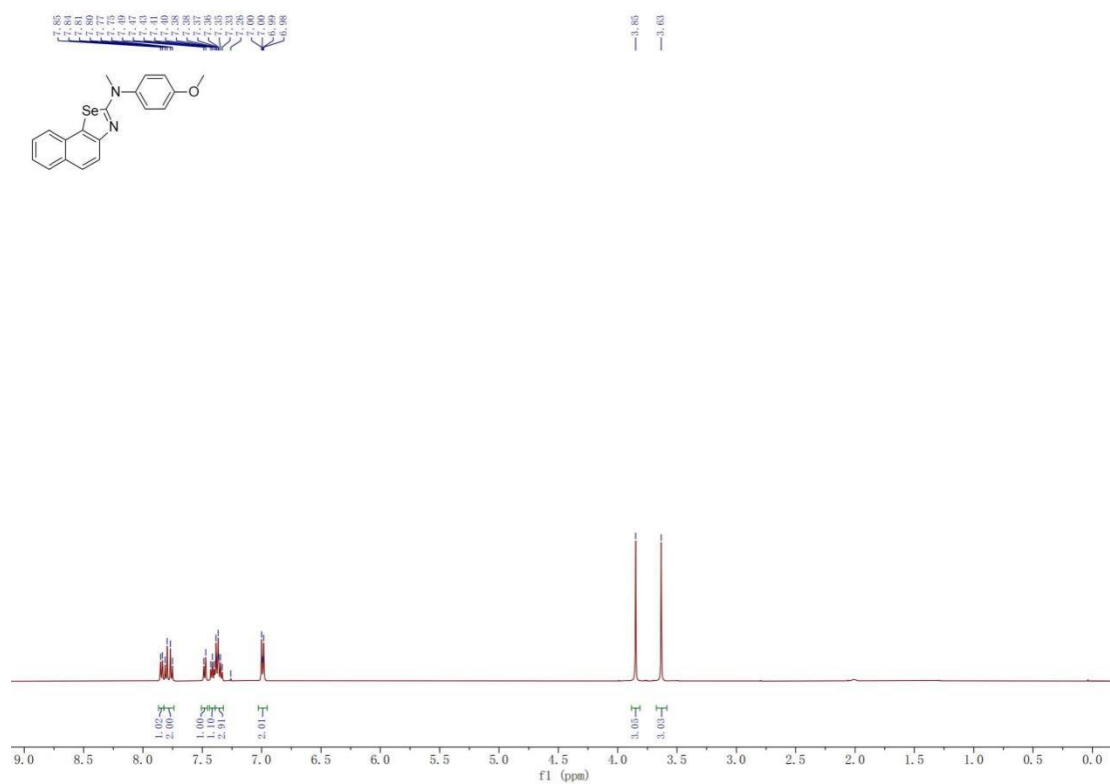

<sup>1</sup>H NMR of compound 4ac

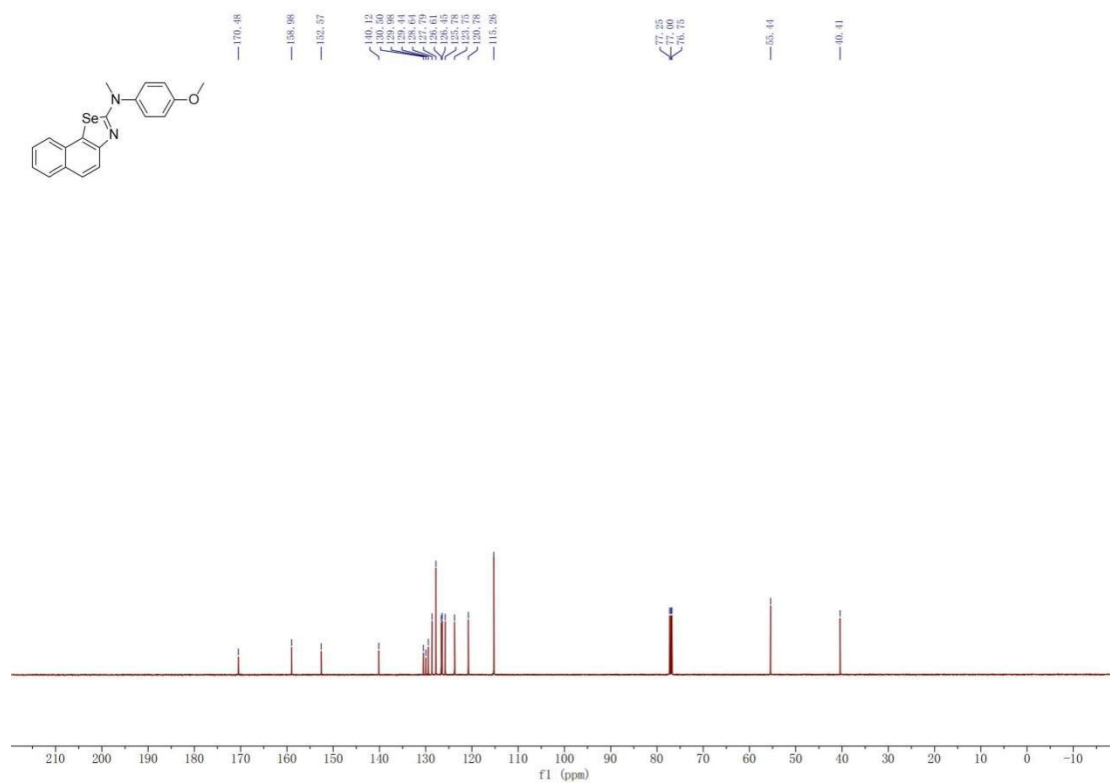





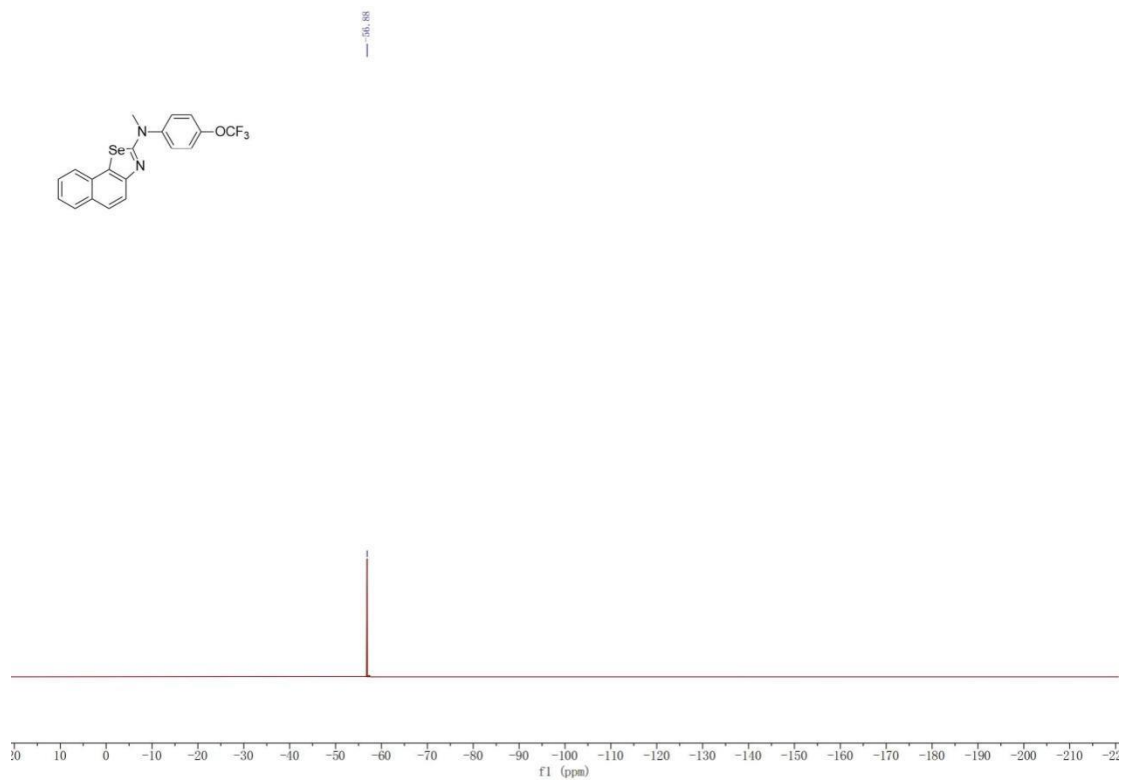

$^{19}\text{F}$  NMR of compound 4ae

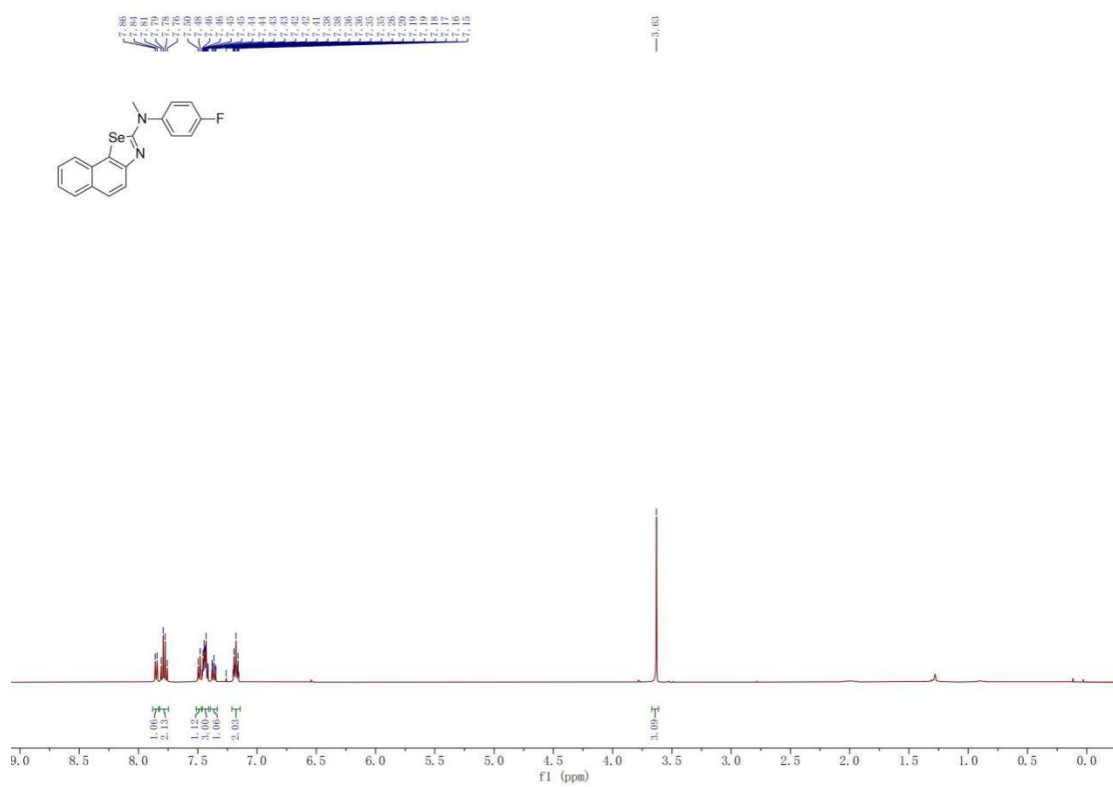

# <sup>1</sup>H NMR of compound **4af**

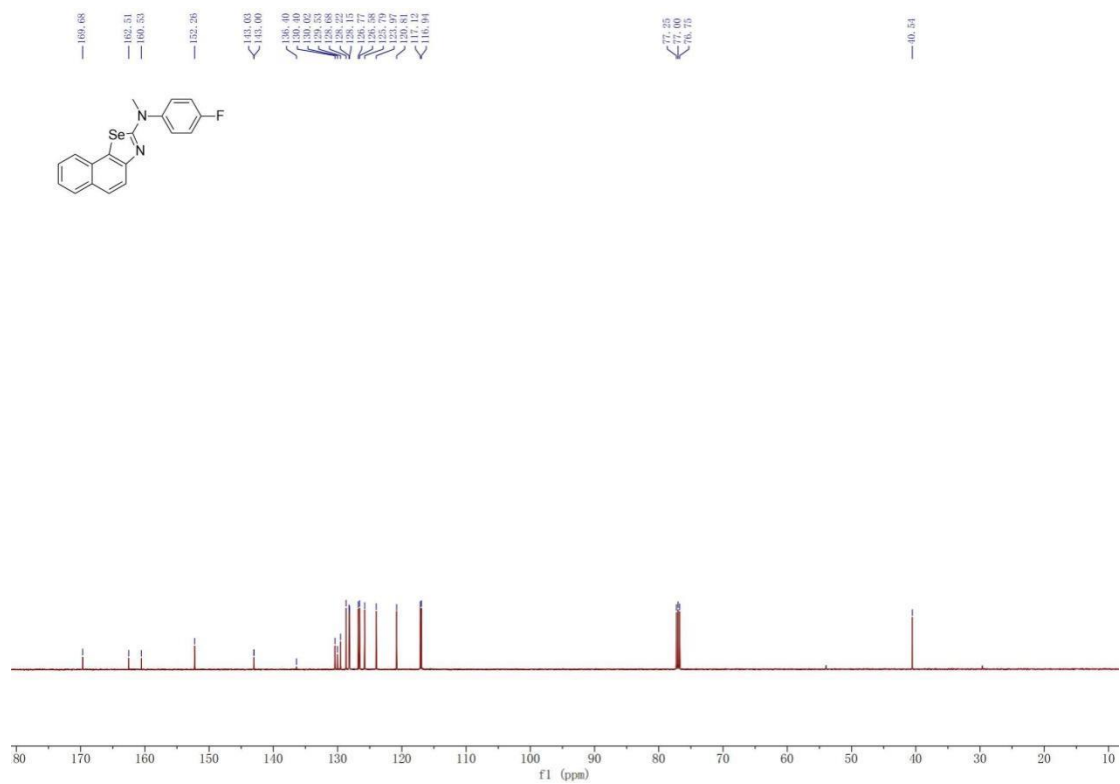

# <sup>13</sup>C NMR of compound **4af**

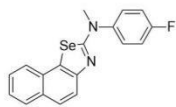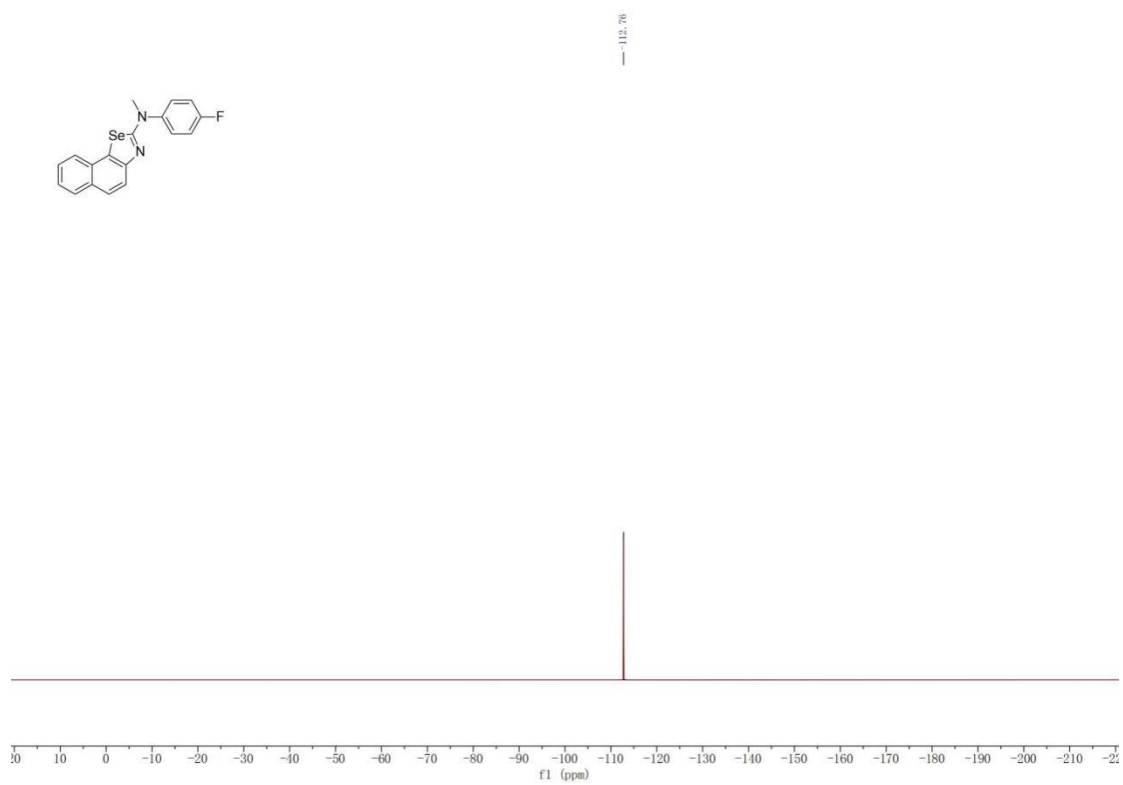

$^{19}\text{F}$  NMR of compound **4af**







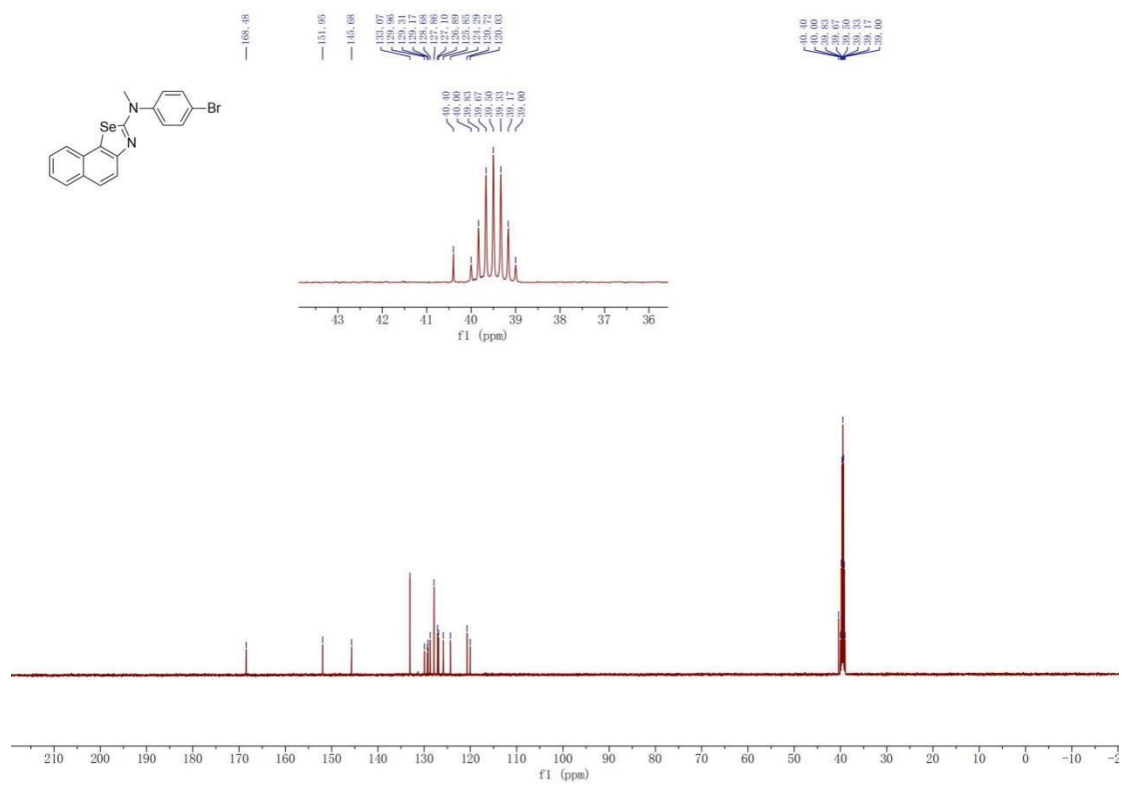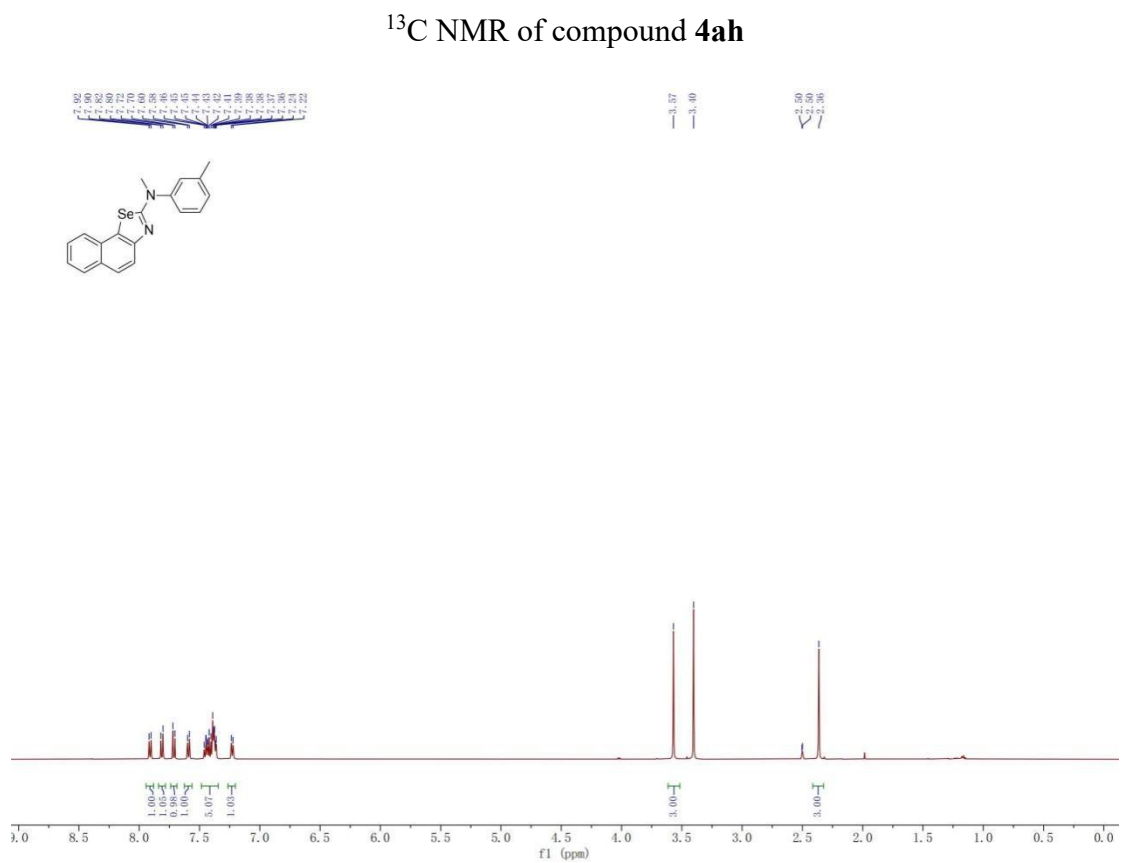

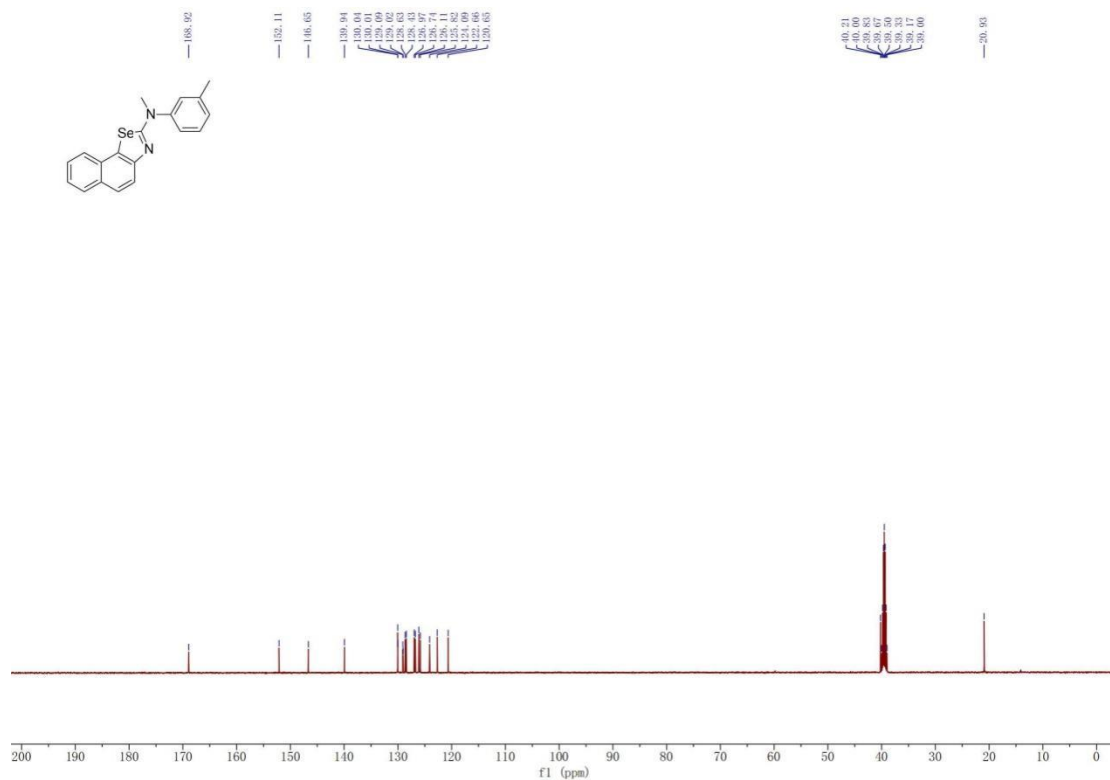

$^{13}\text{C}$  NMR of compound 4ai

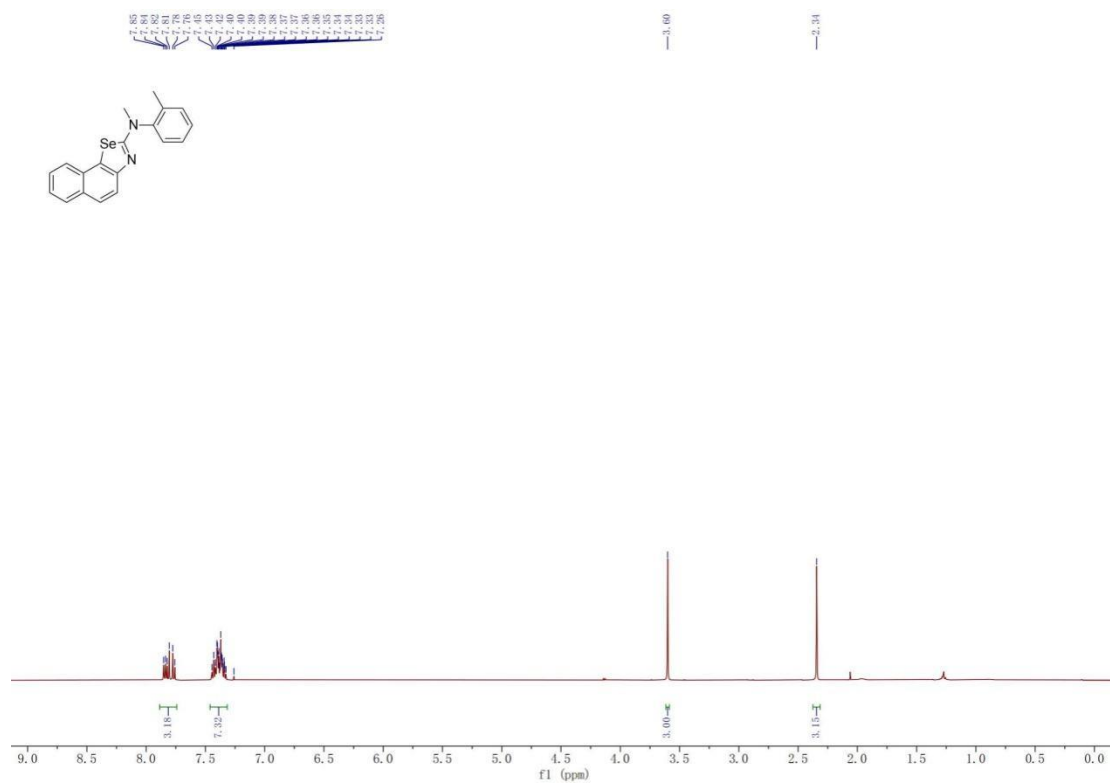

$^1\text{H}$  NMR of compound 4aj



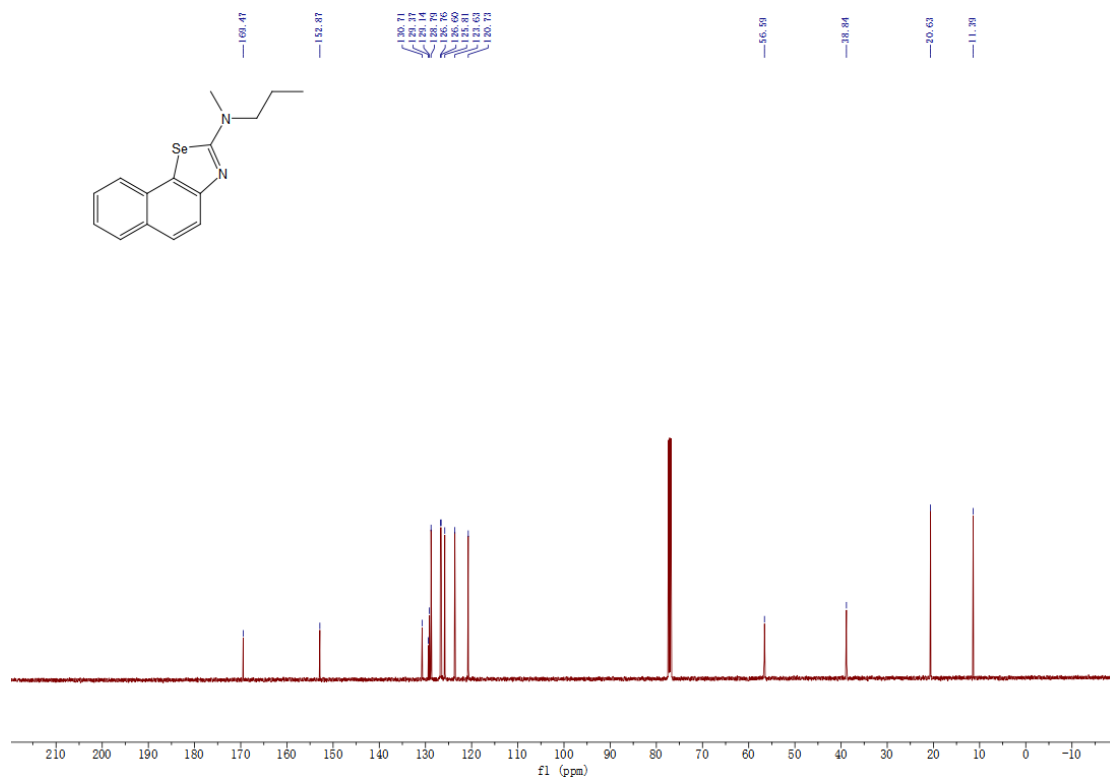

$^{13}\text{C}$  NMR of compound **4ak**

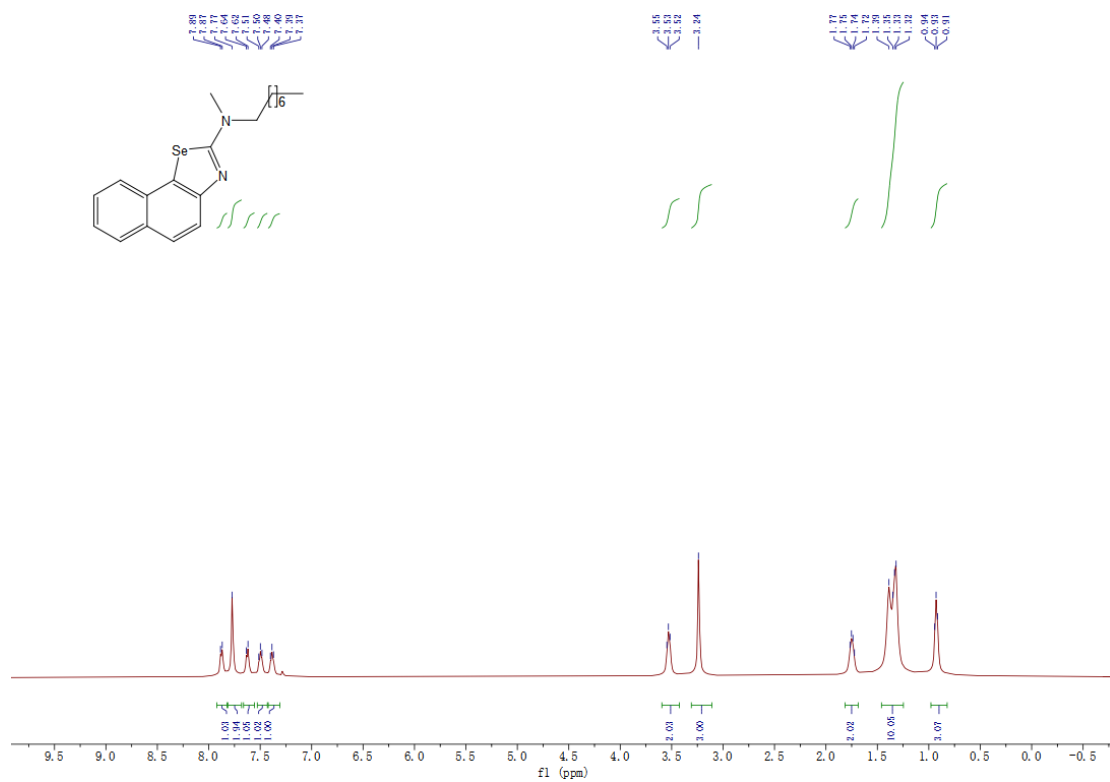

$^1\text{H}$  NMR of compound **4al**



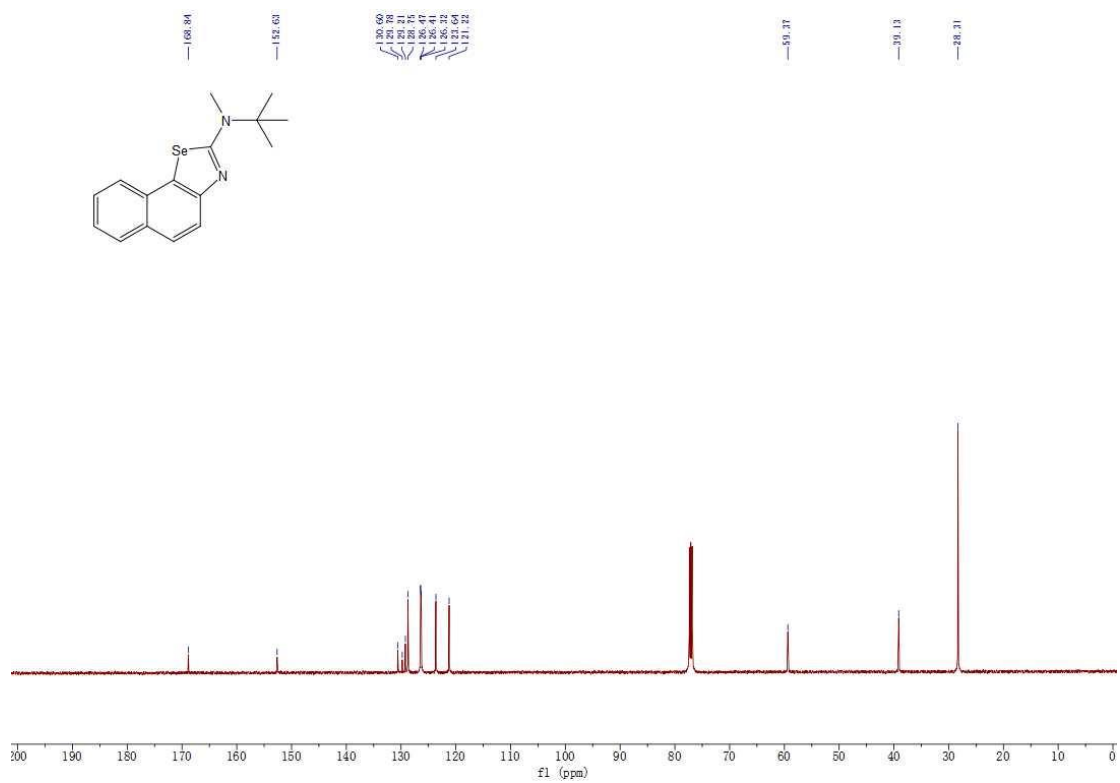

$^{13}\text{C}$  NMR of compound 4am

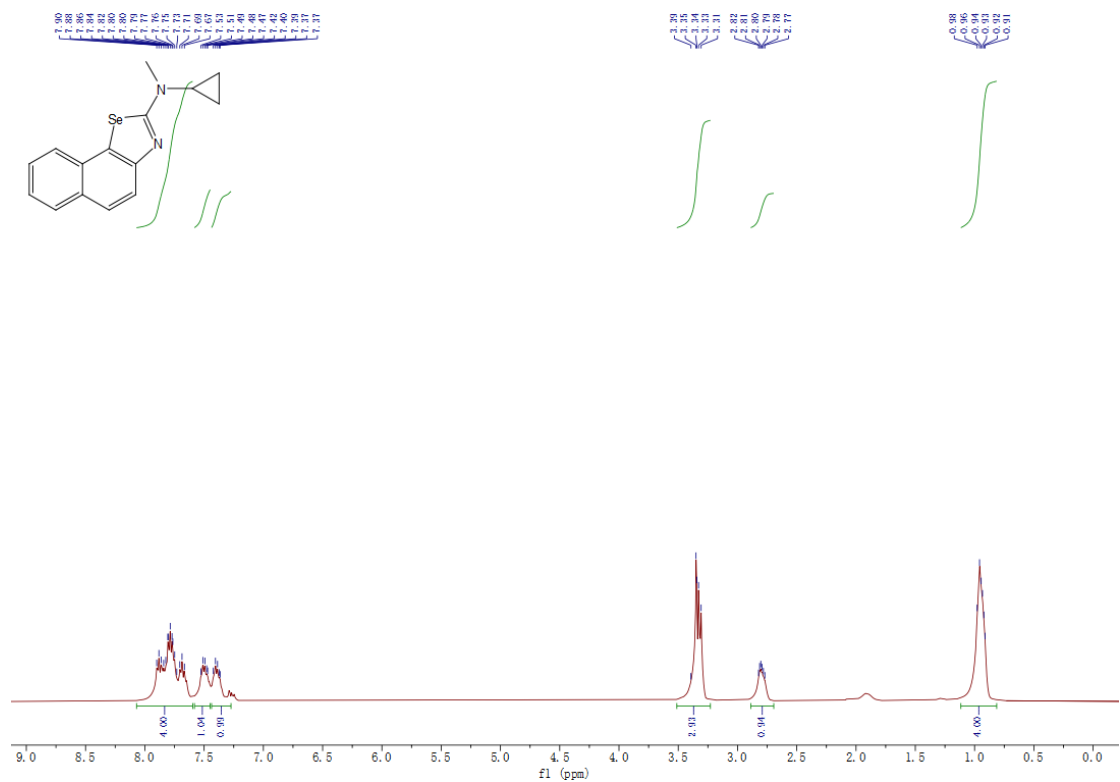

$^1\text{H}$  NMR of compound 4an

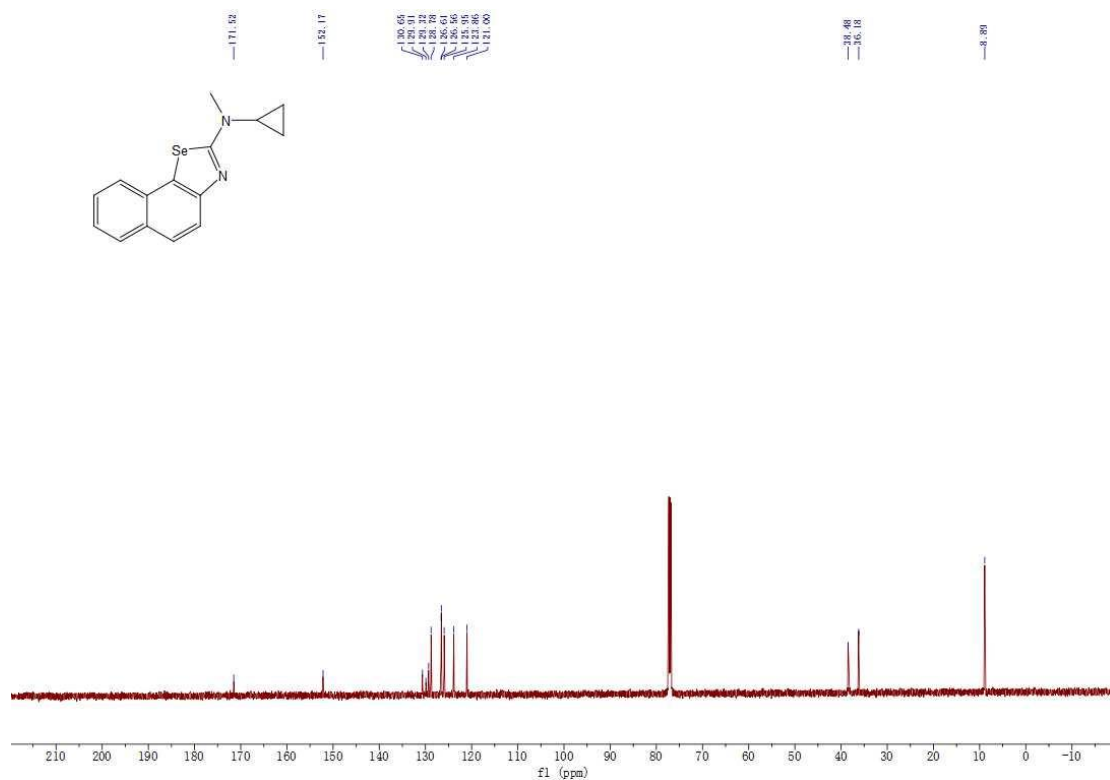

<sup>13</sup>C NMR of compound 4an

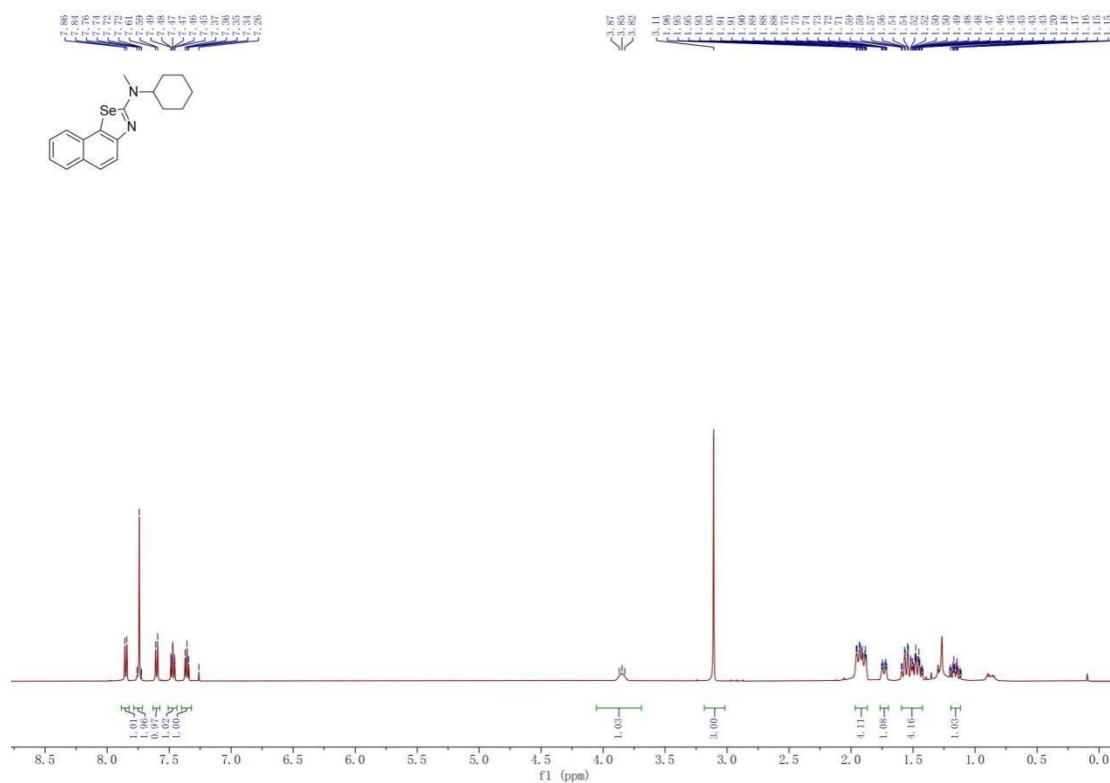

<sup>1</sup>H NMR of compound 4ao





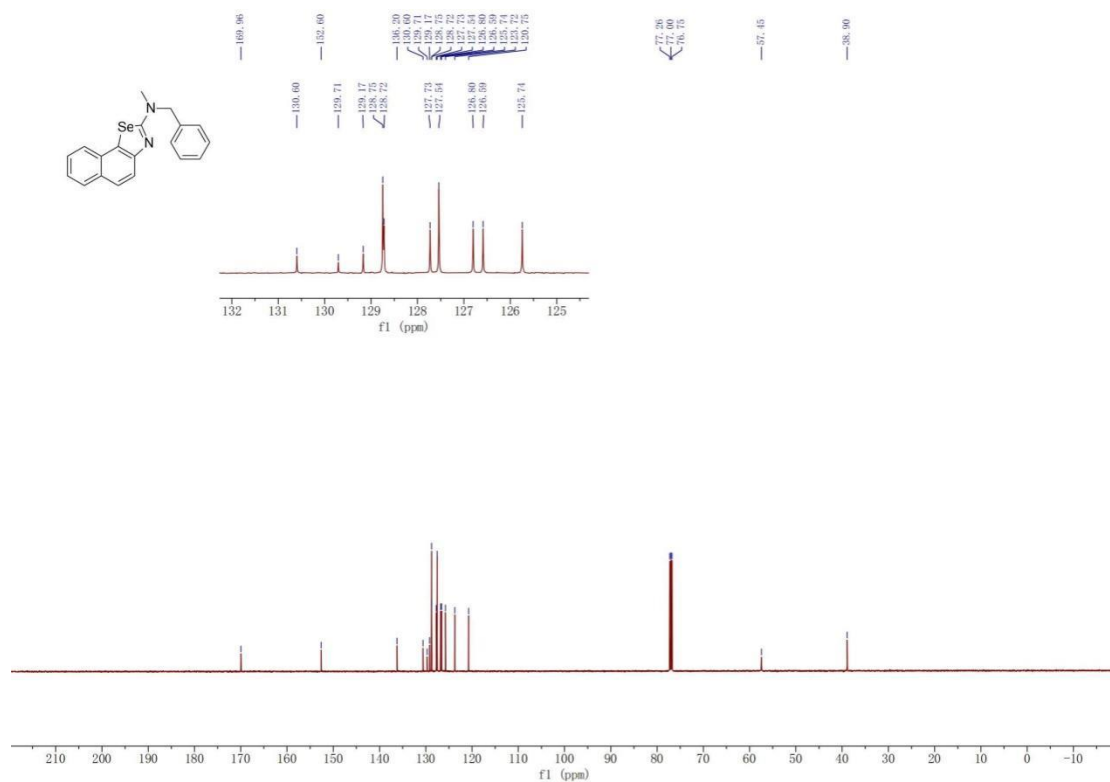

<sup>13</sup>C NMR of compound **4ap**

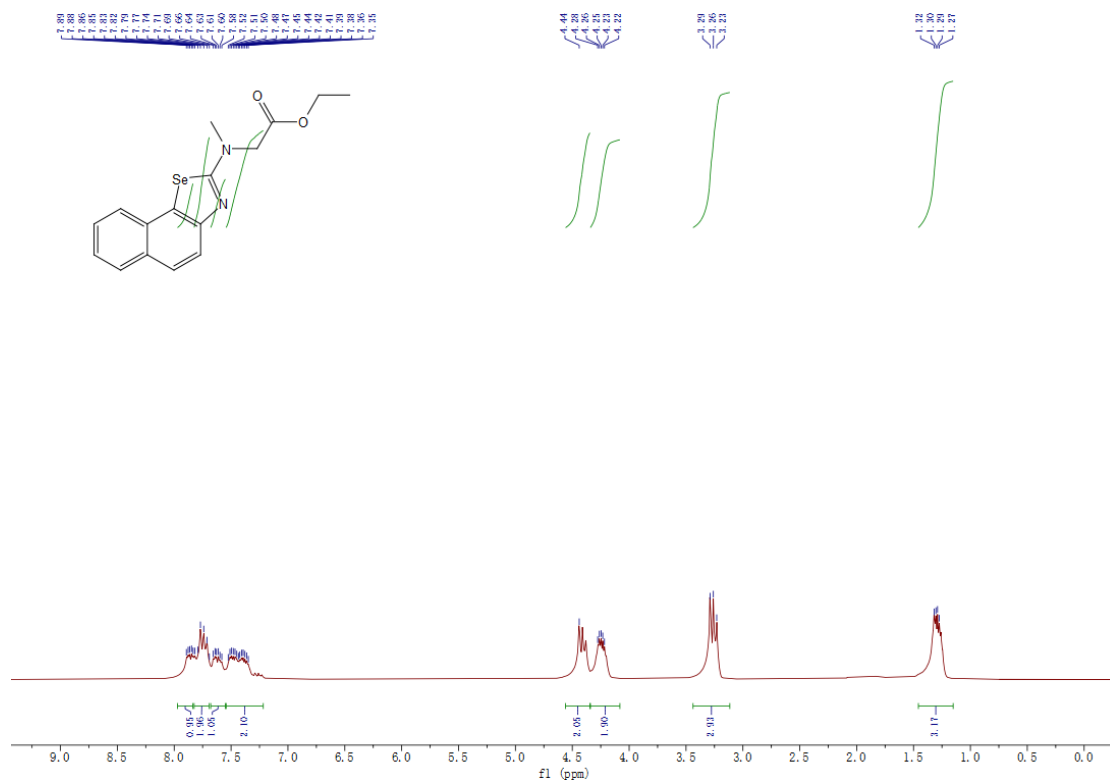

<sup>1</sup>H NMR of compound **4aq**



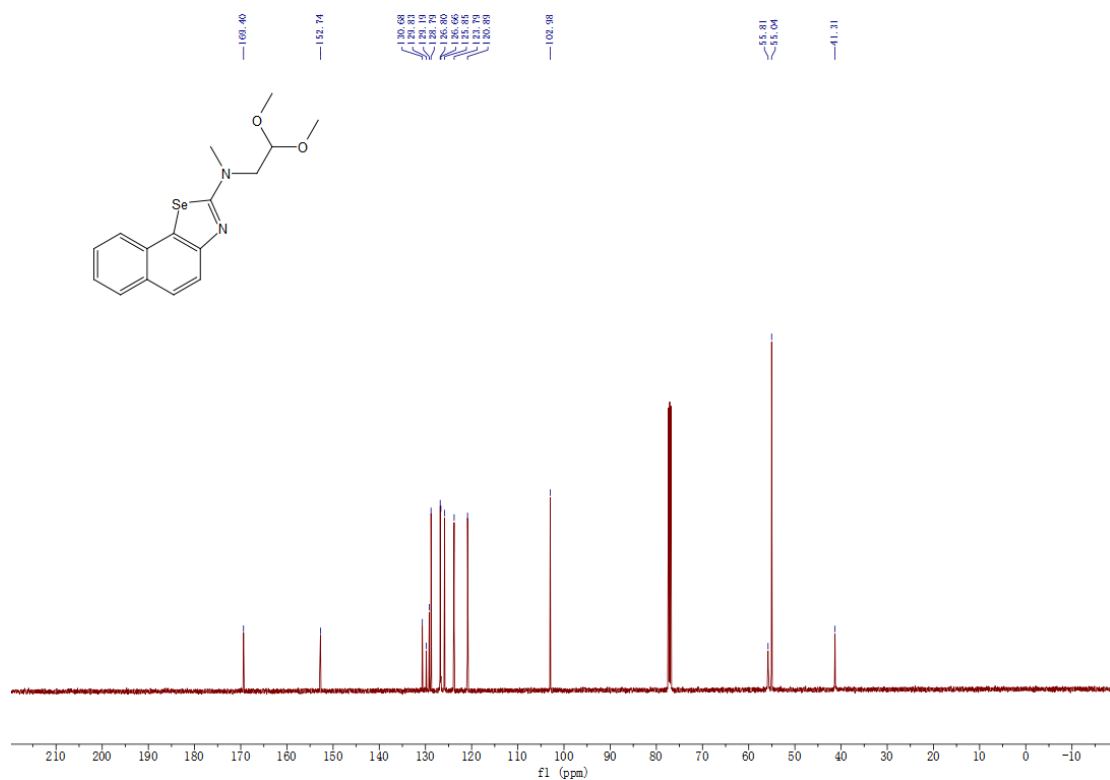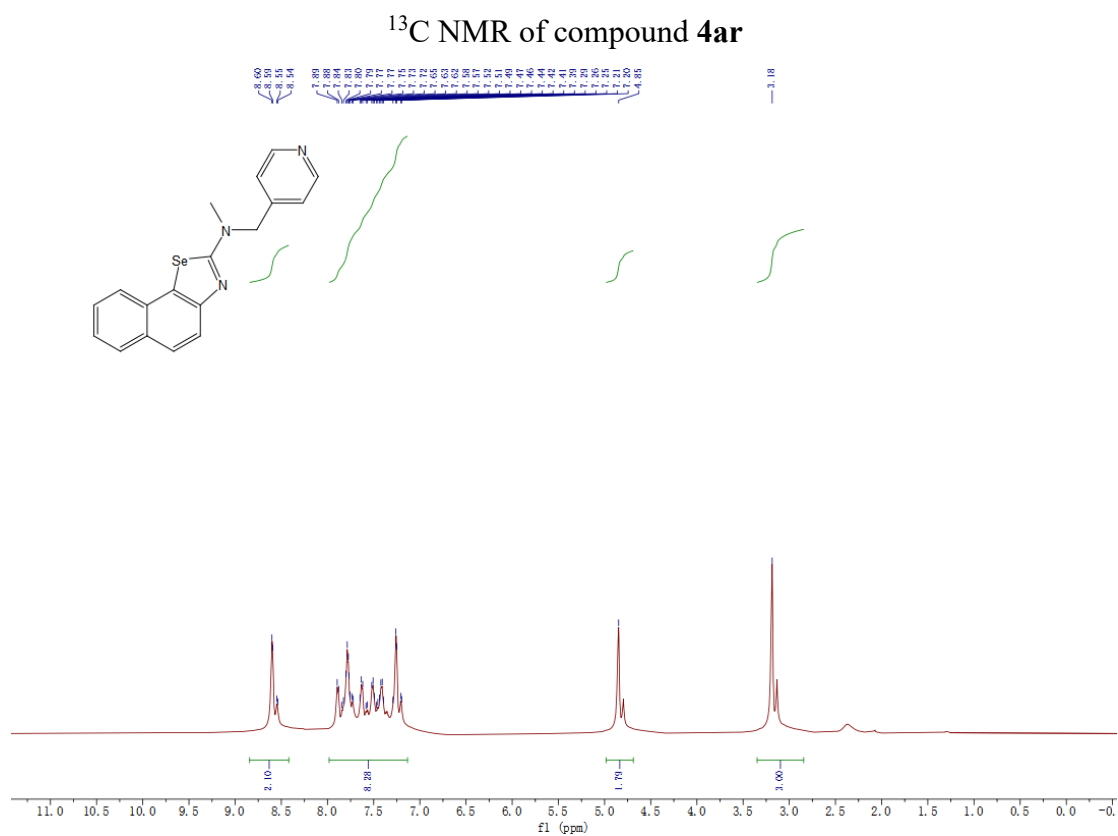

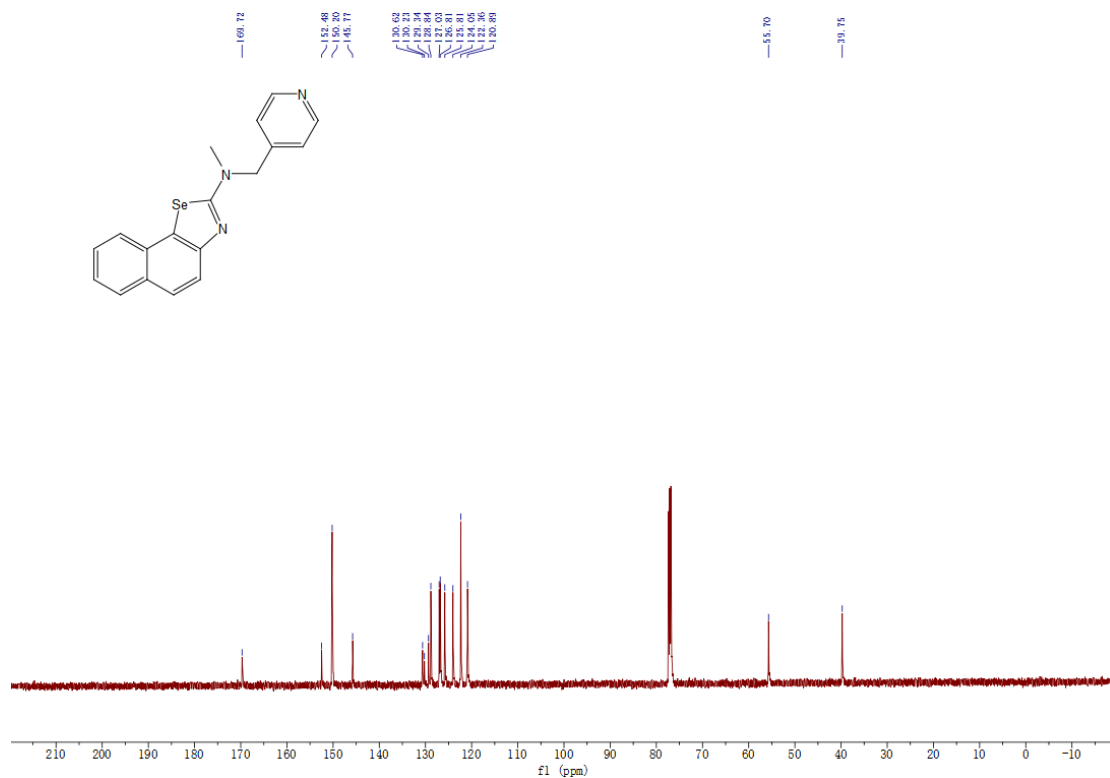

$^{13}\text{C}$  NMR of compound 4as

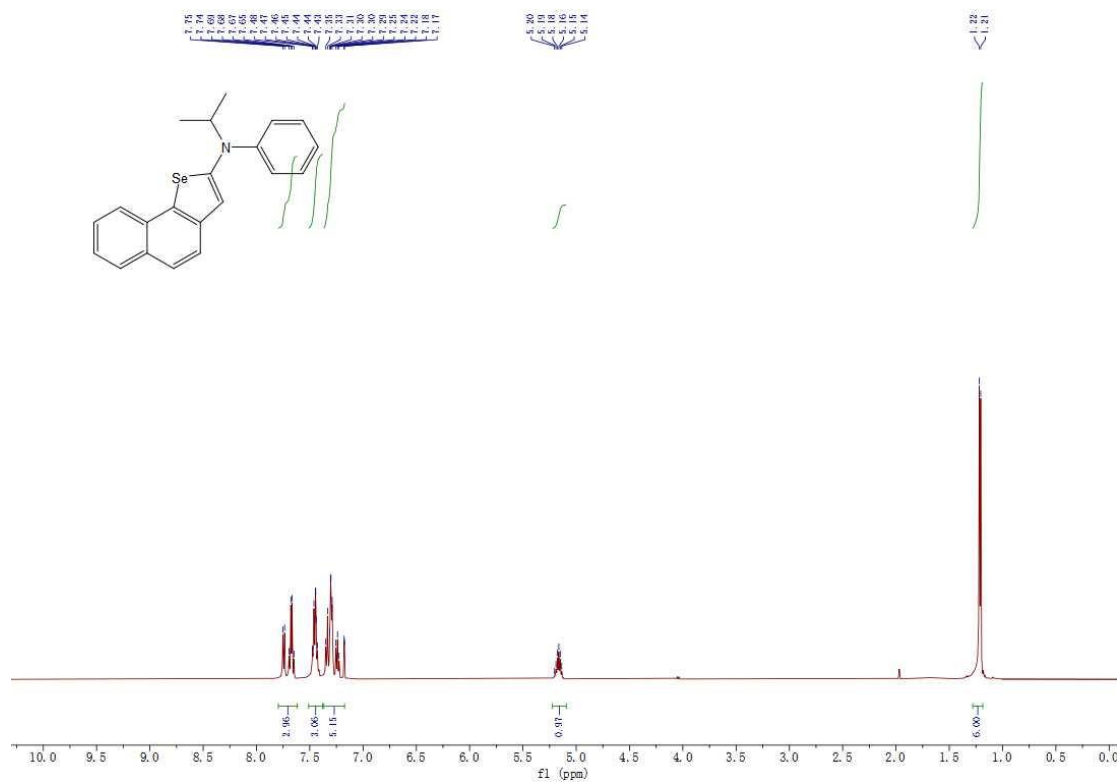

$^1\text{H}$  NMR of compound 4at



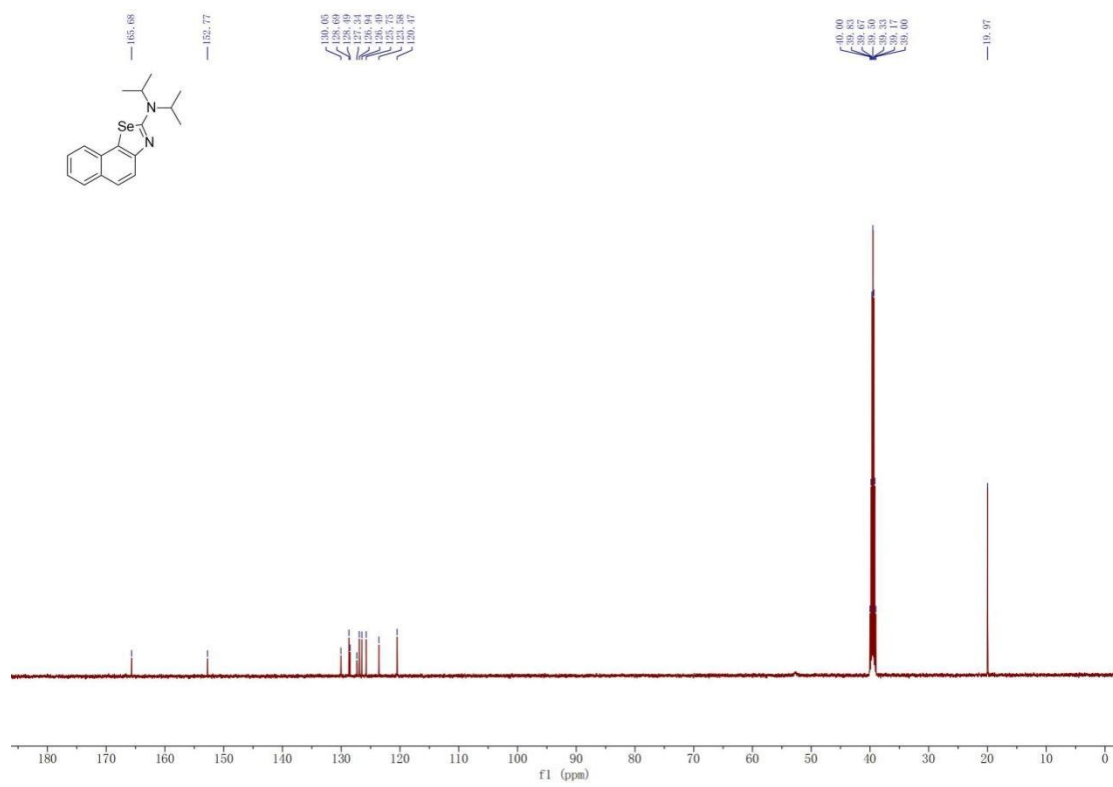

$^{13}\text{C}$  NMR of compound **4au**





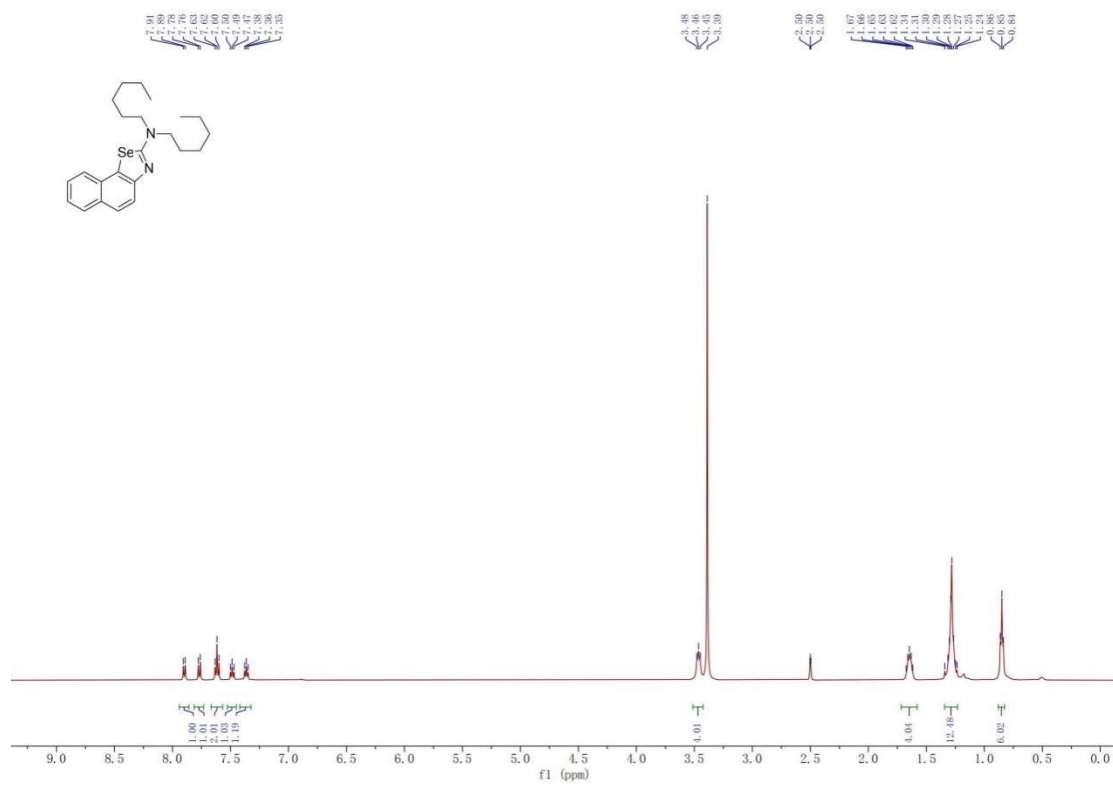

**<sup>1</sup>H NMR of compound 4aw**

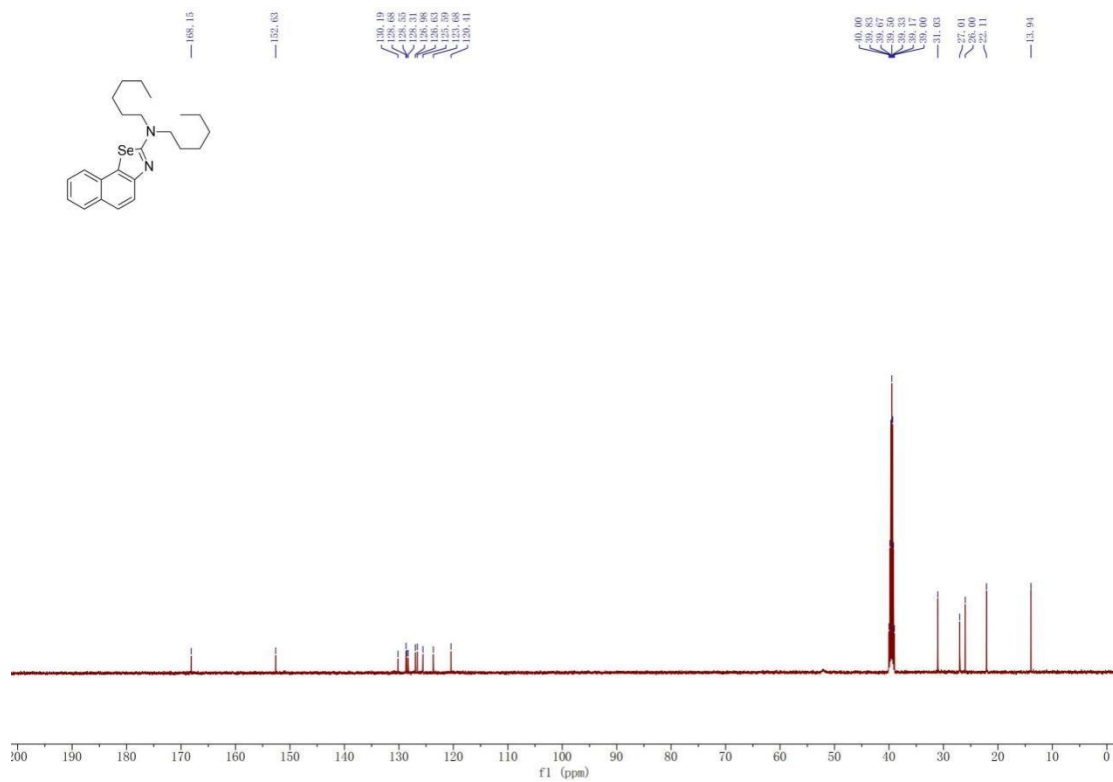

**<sup>13</sup>C NMR of compound 4aw**

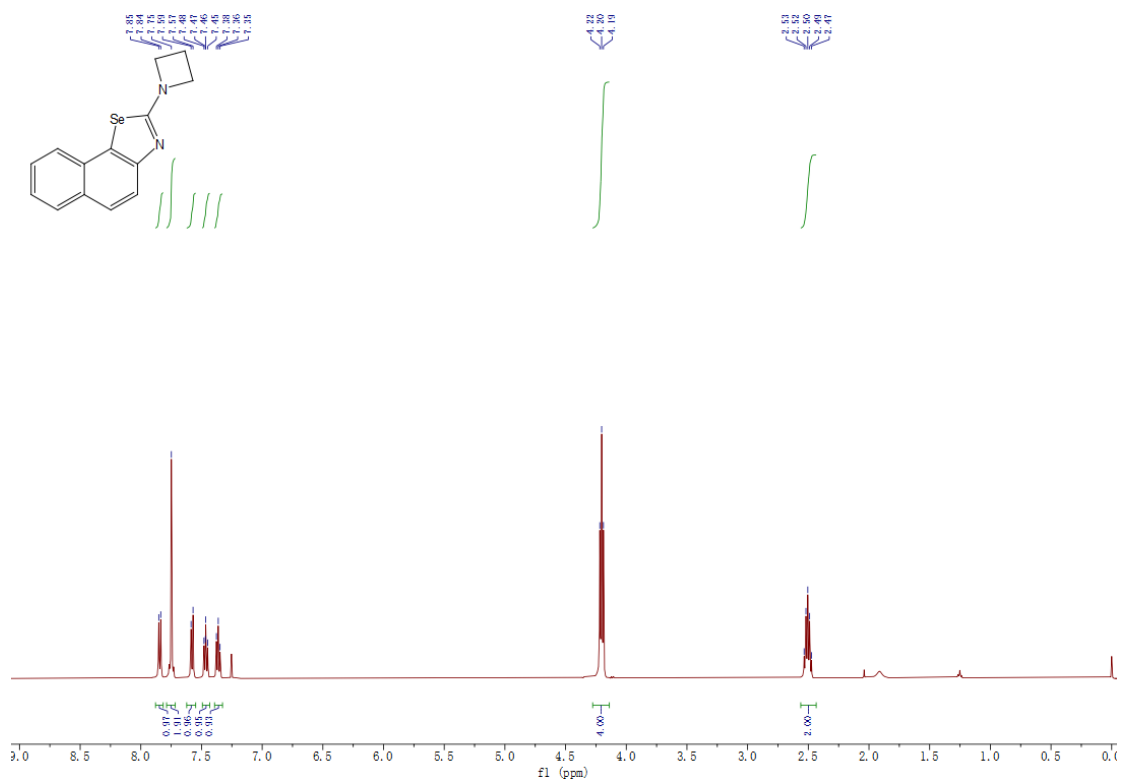

**<sup>1</sup>H NMR of compound 4ax**

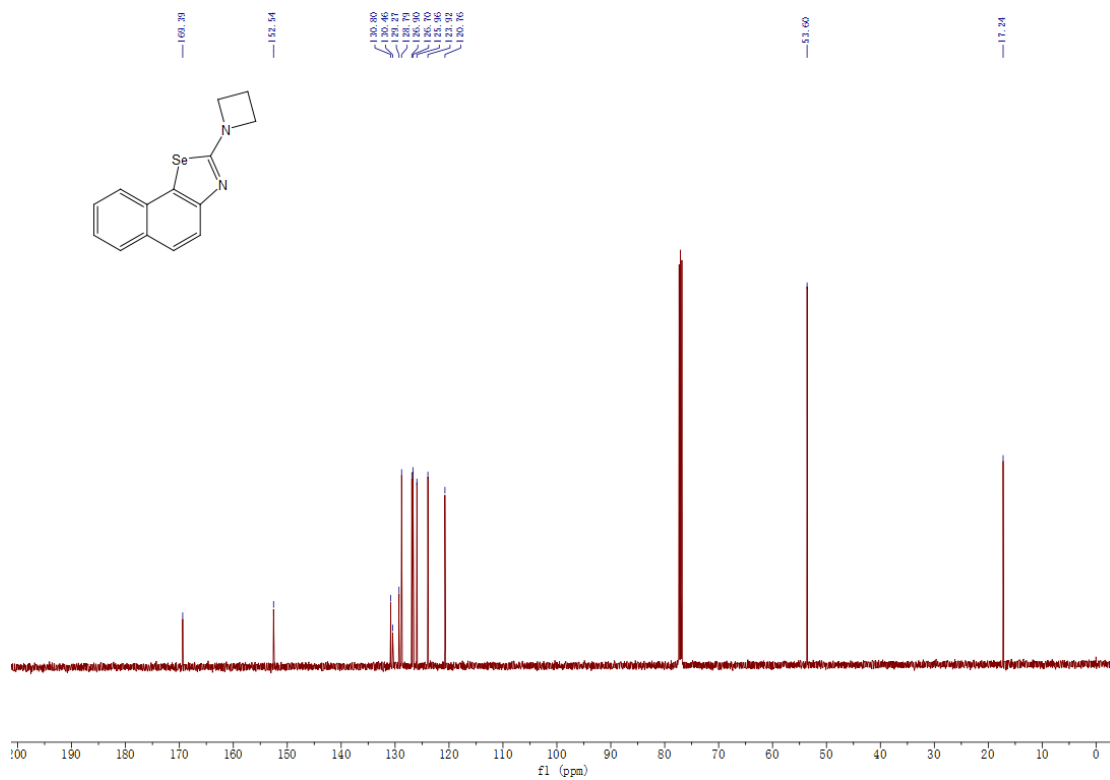

**<sup>13</sup>C NMR of compound 4ax**



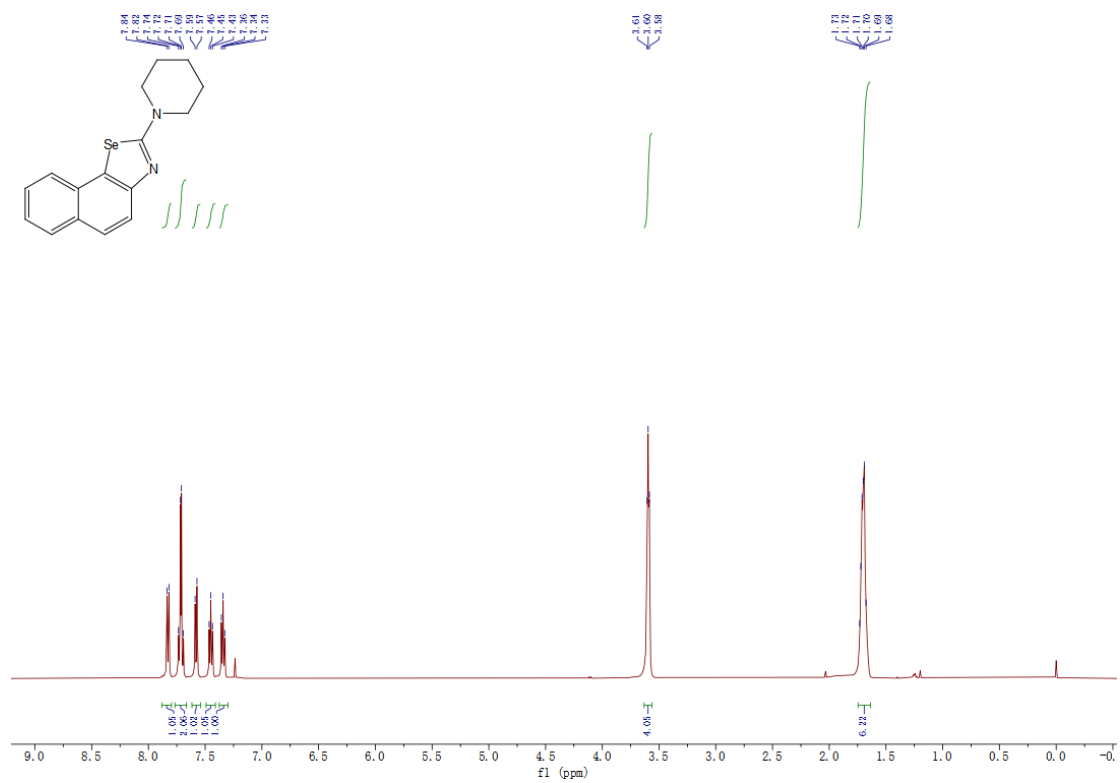

**<sup>1</sup>H NMR of compound 4az**

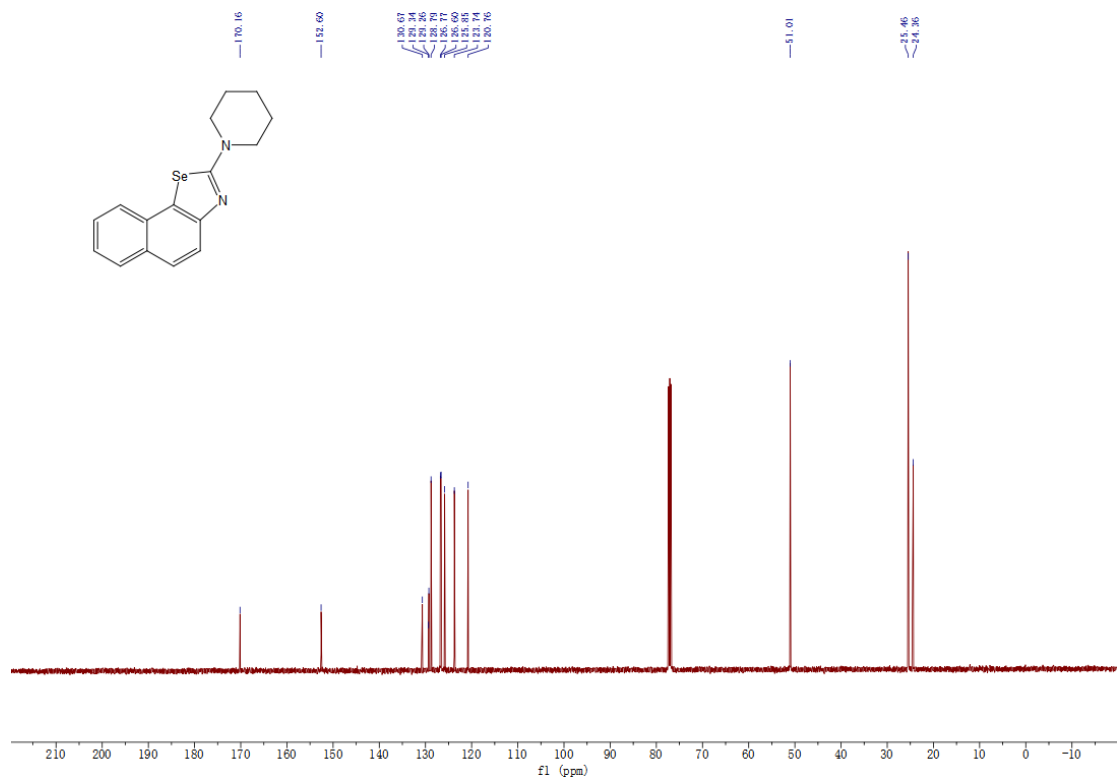

**<sup>13</sup>C NMR of compound 4az**

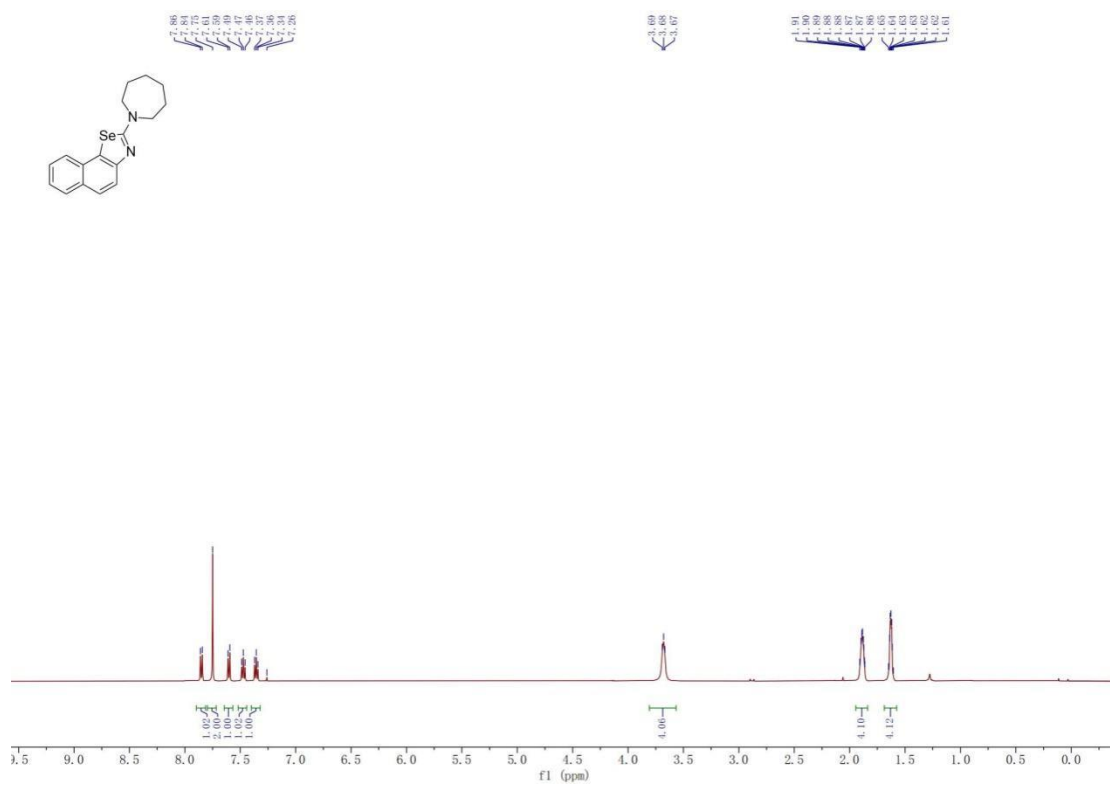

$^1\text{H}$  NMR of compound 4aA

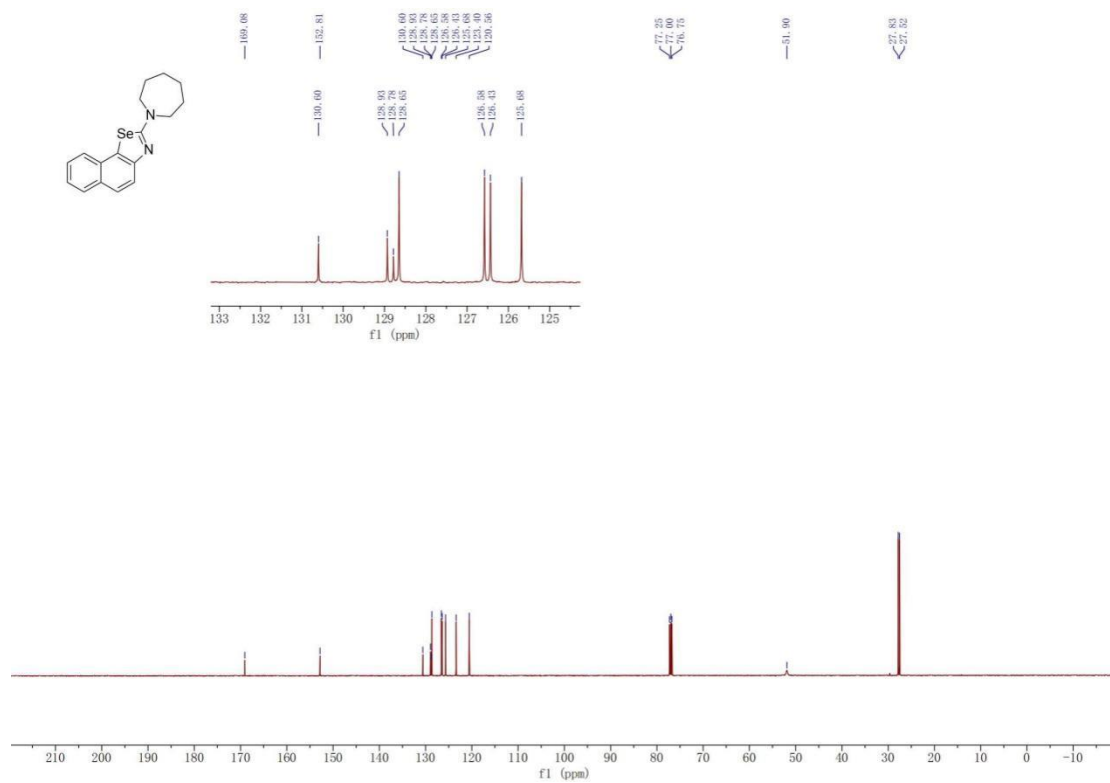

**<sup>13</sup>C NMR of compound 4aA**

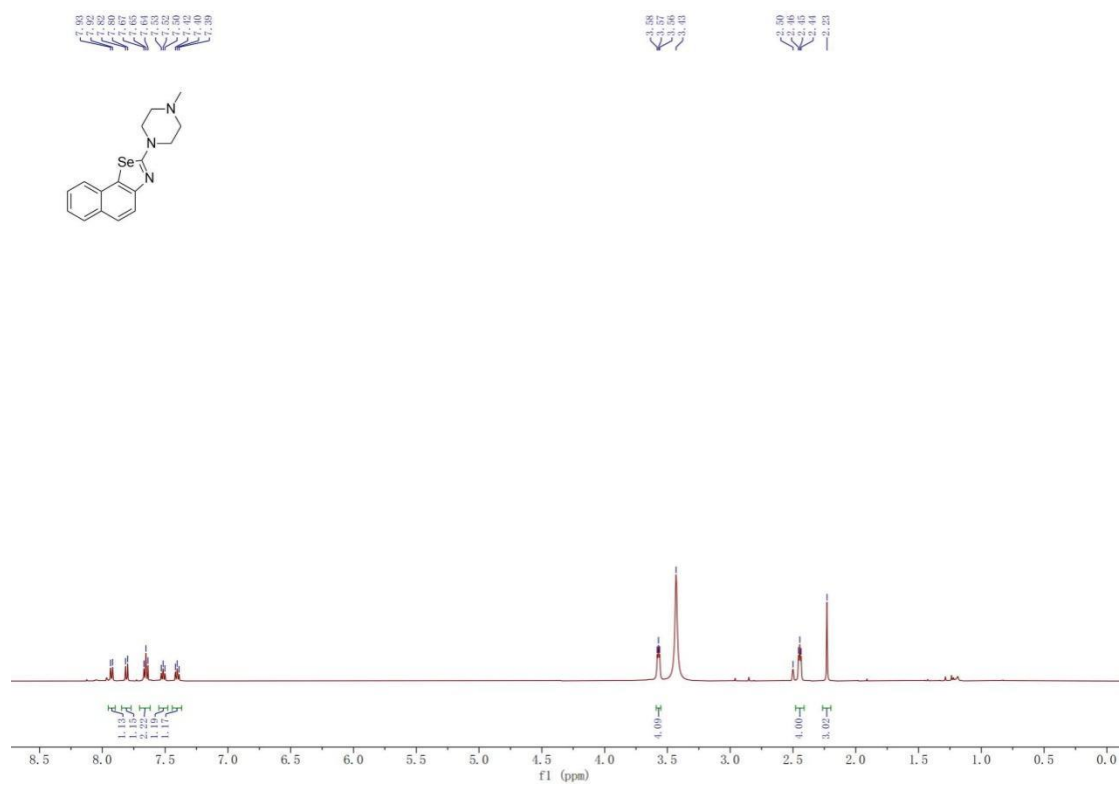

**<sup>1</sup>H NMR of compound 4aB**

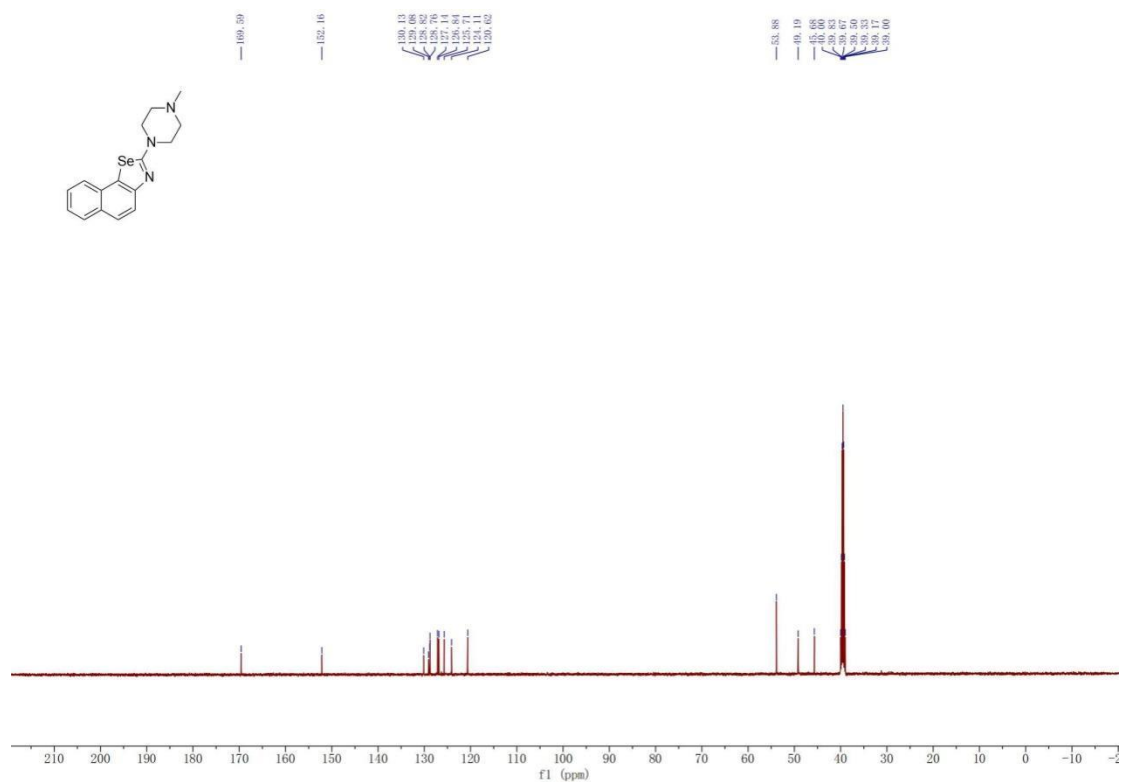

$^{13}\text{C}$  NMR of compound 4aB

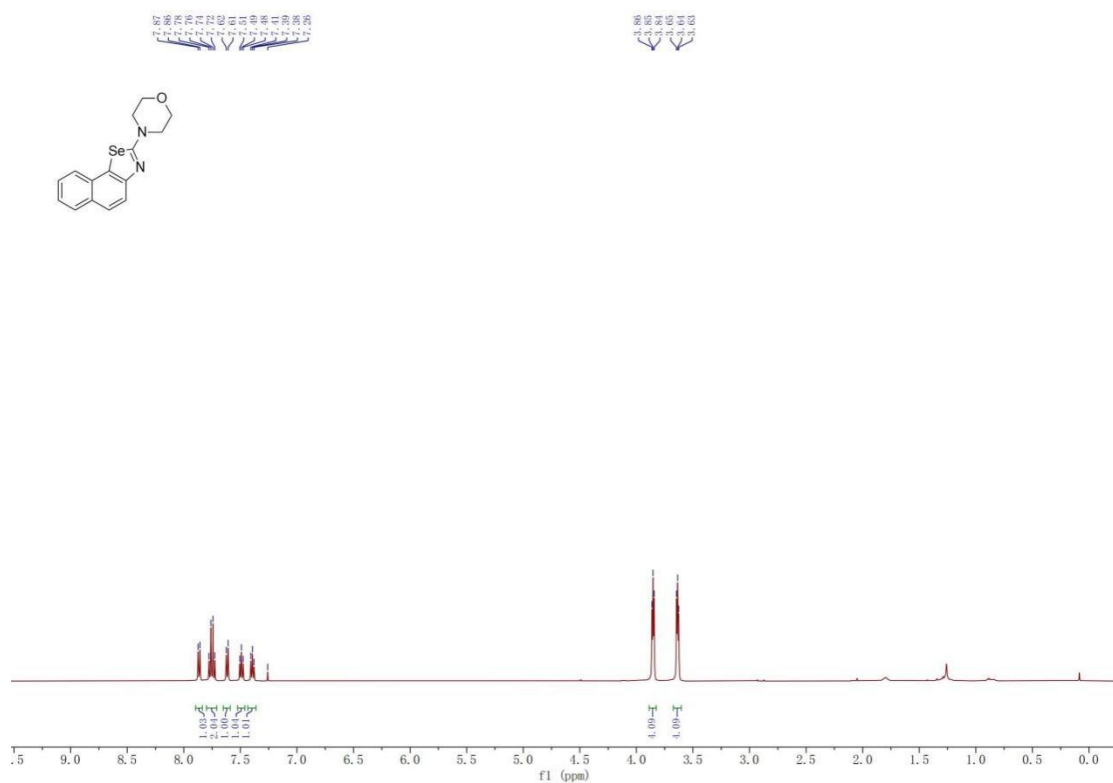

$^1\text{H}$  NMR of compound 4aC

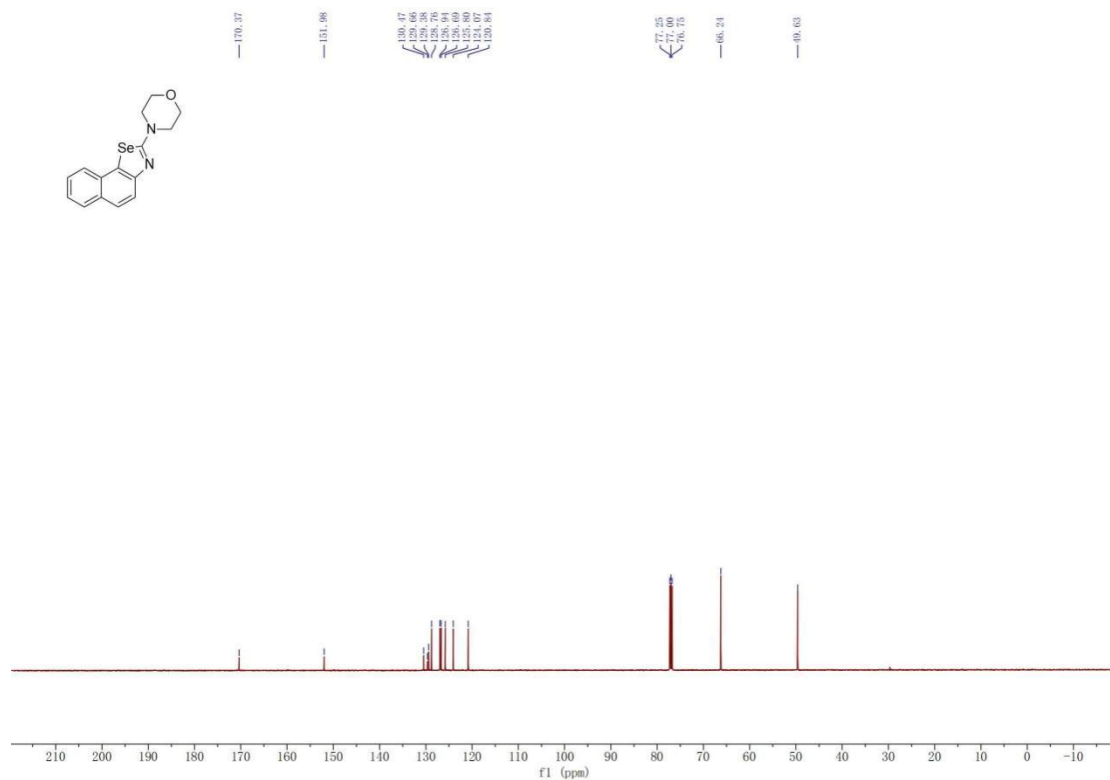

$^{13}\text{C}$  NMR of compound **4aC**

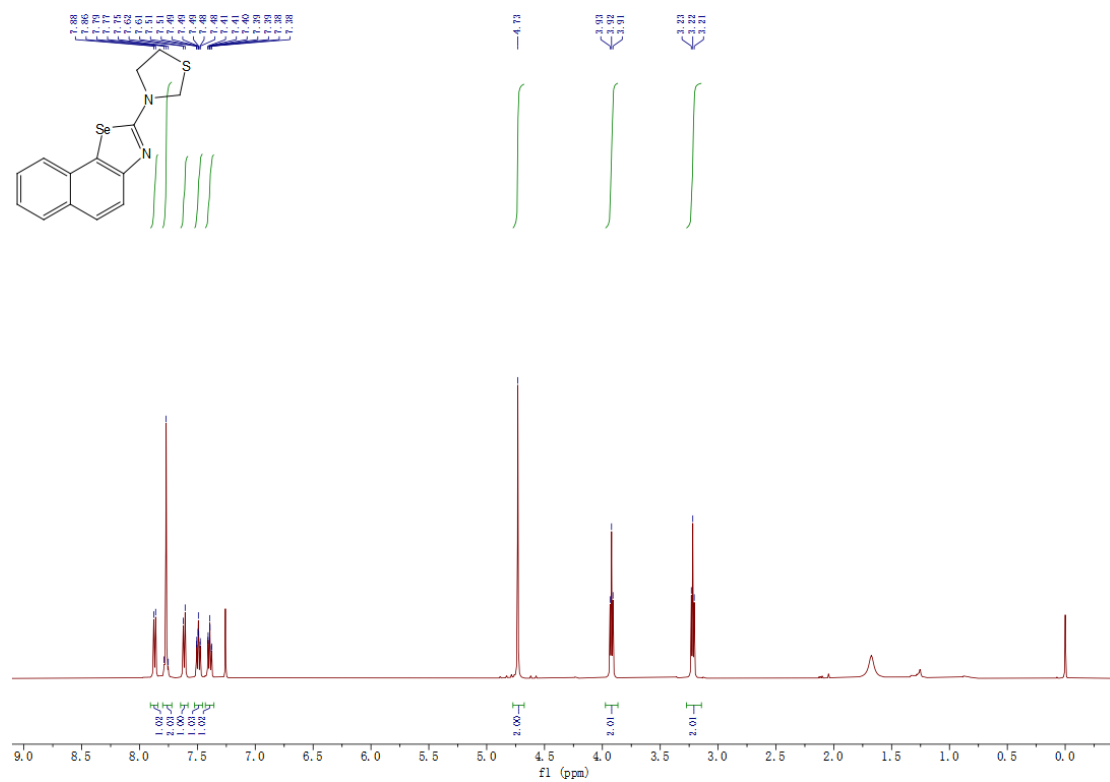

$^1\text{H}$  NMR of compound **4aD**



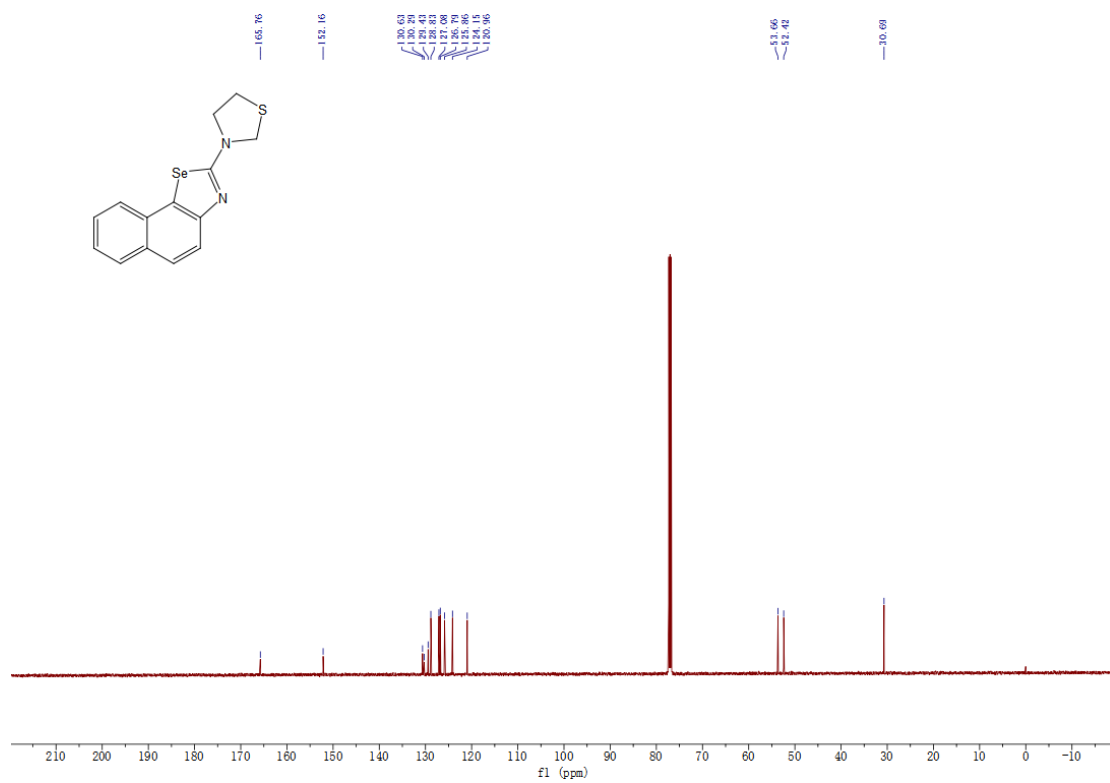

$^{13}\text{C}$  NMR of compound **4aD**

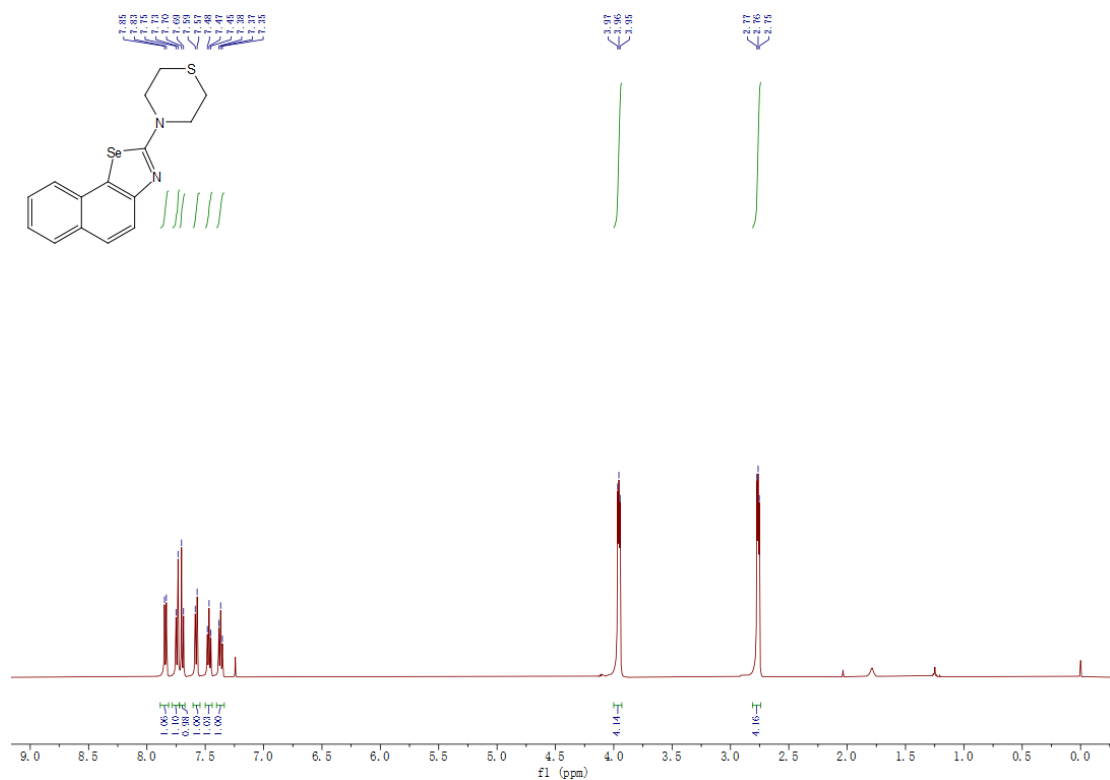

**<sup>1</sup>H NMR of compound 4aE**

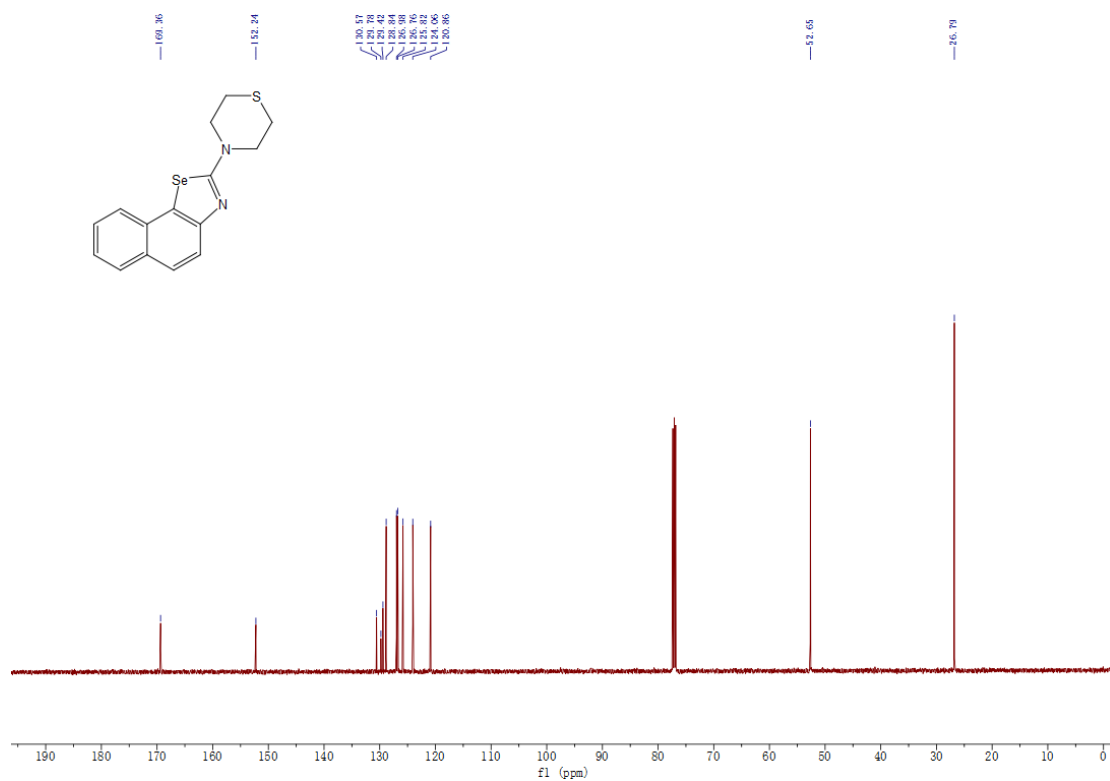

**<sup>13</sup>C NMR of compound 4aE**

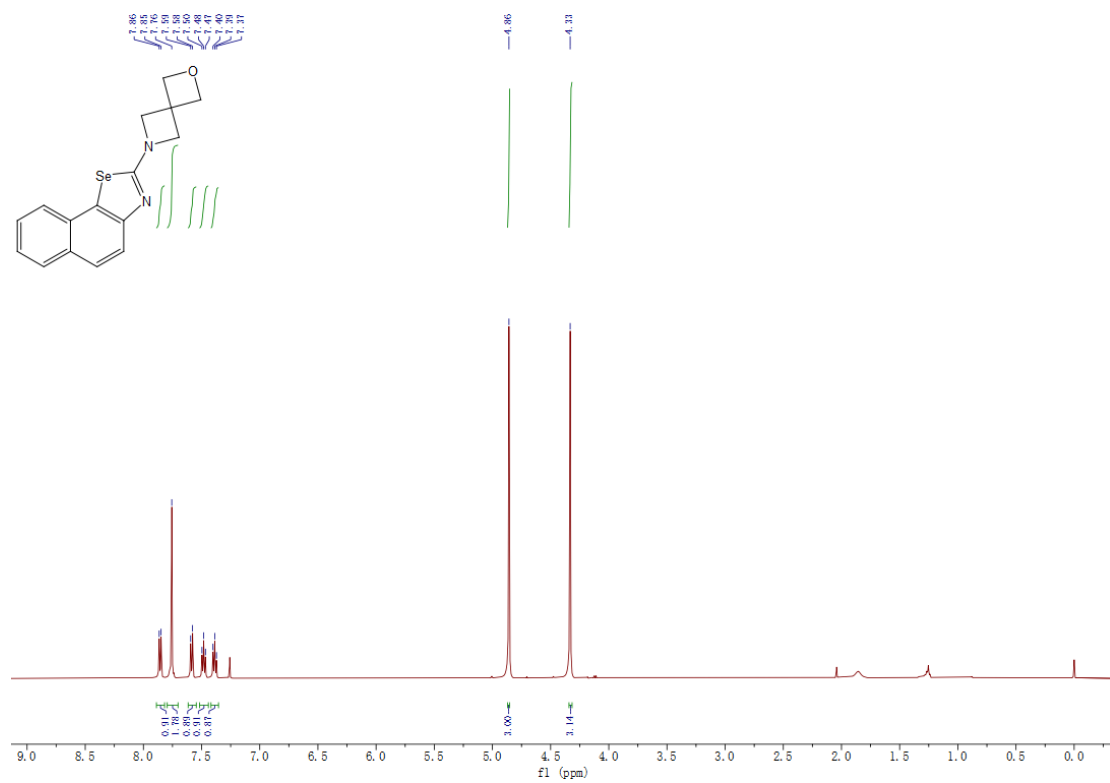

**<sup>1</sup>H NMR of compound 4aF**

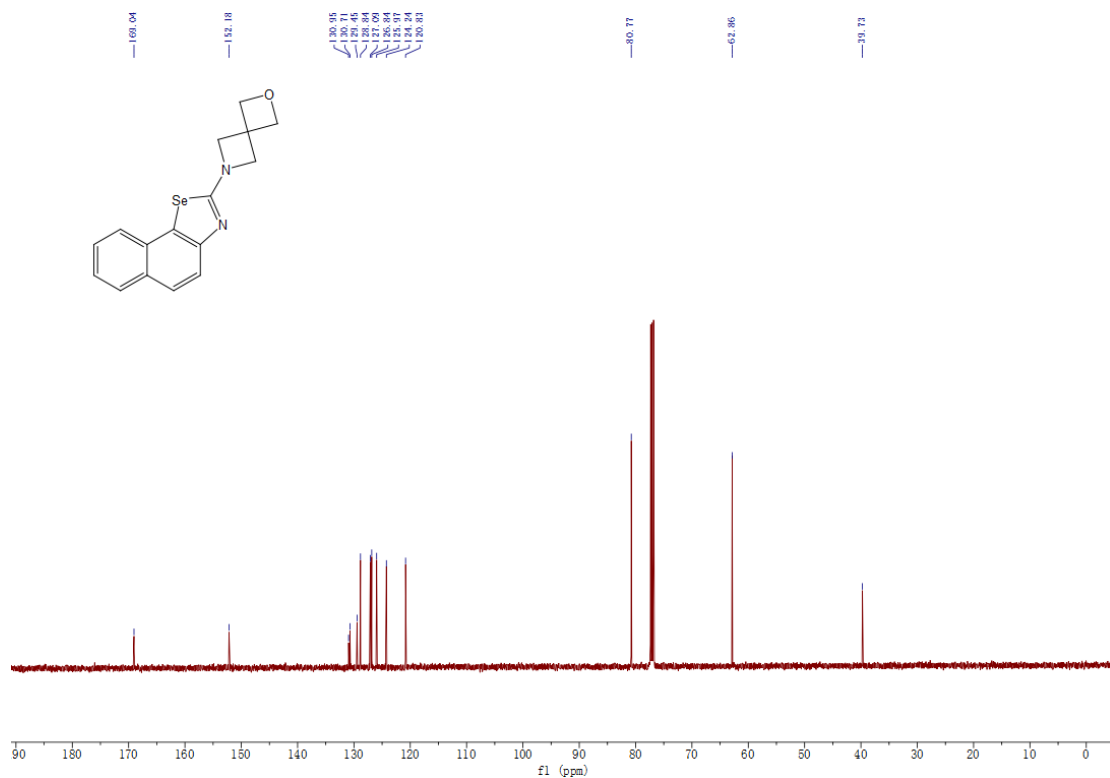

**<sup>13</sup>C NMR of compound 4aF**

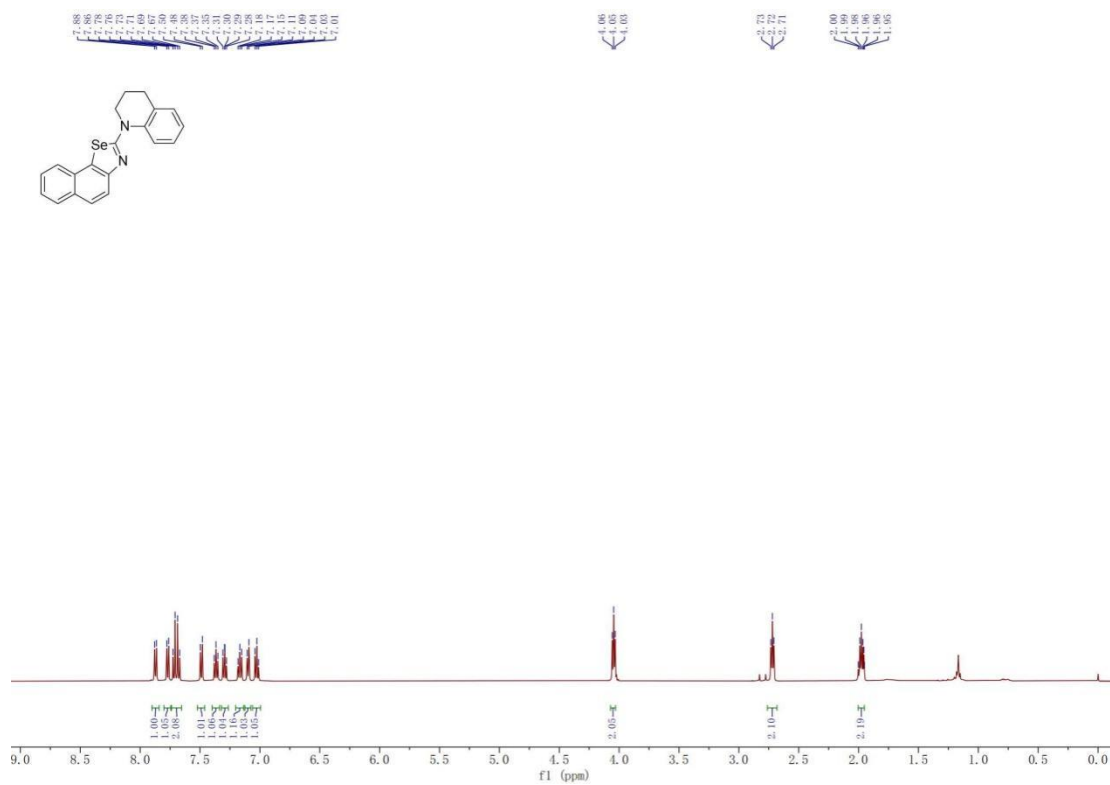

$^1\text{H}$  NMR of compound 4aG

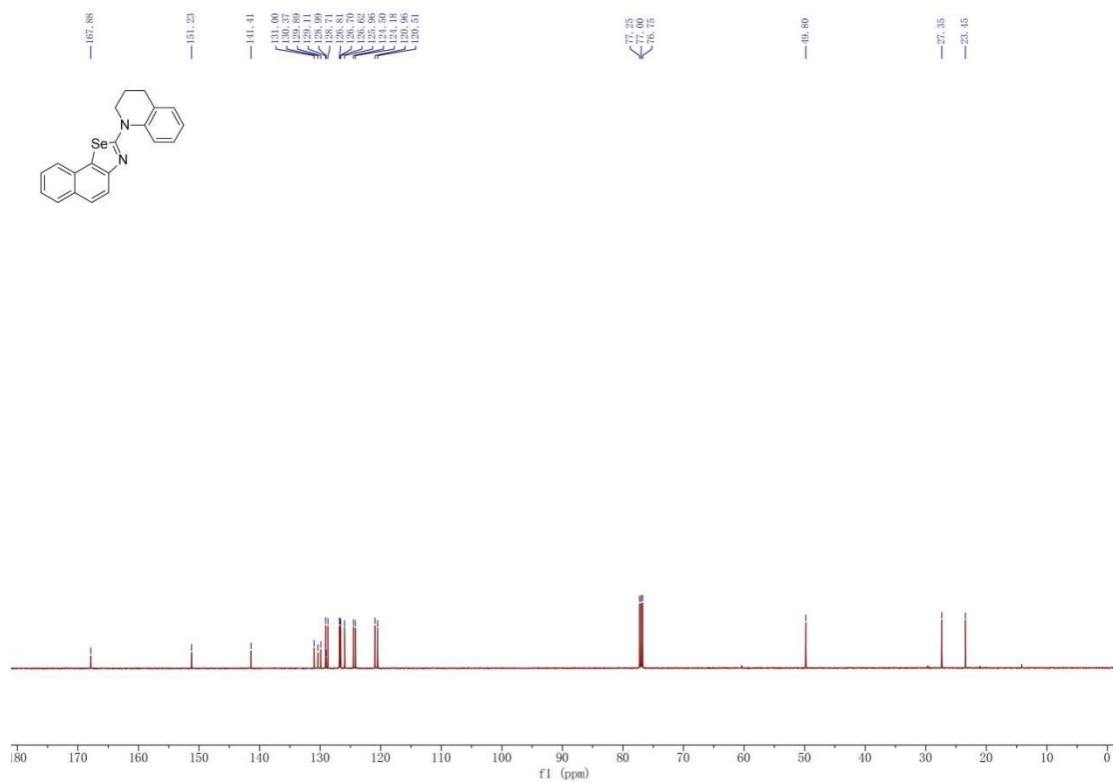

<sup>13</sup>C NMR of compound 4aG

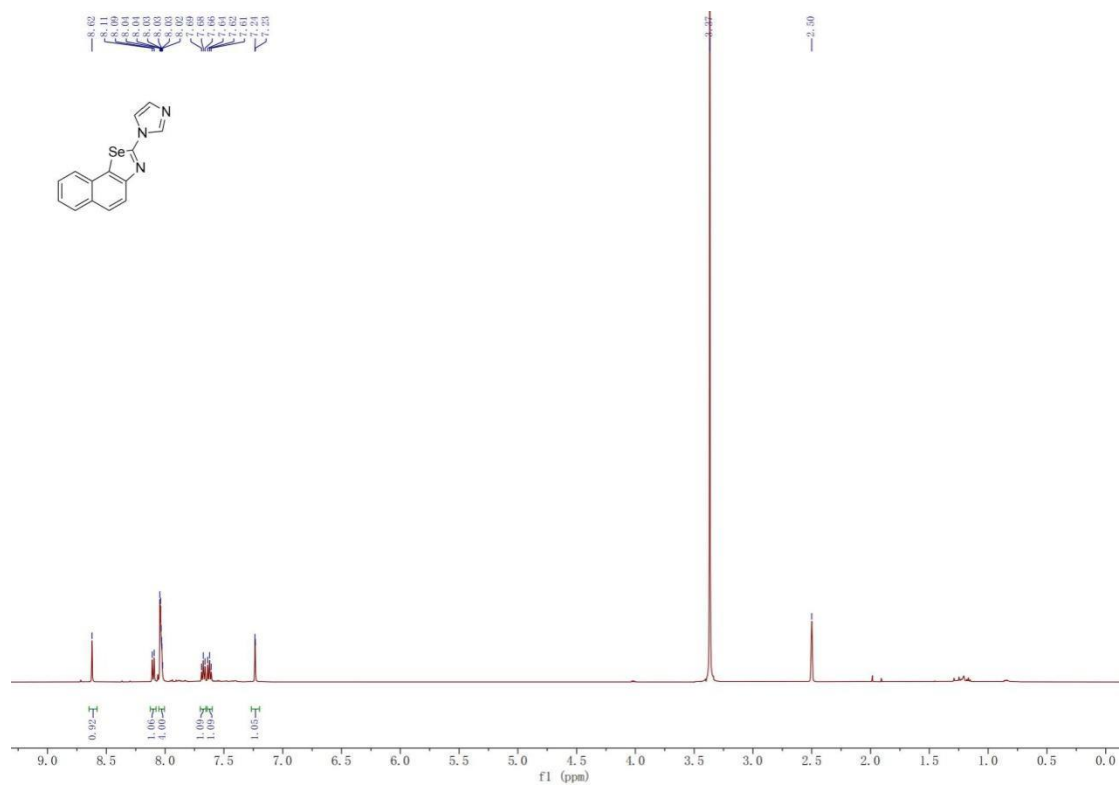

Supplement: d3gc02575f1.pdf [file d3gc02575f1.pdf]
